# Supplementary material
Source: PubMed Central journal article supplement (PMC4245323)
Supplement: NIHMS632230-supplement-2.pdf [file NIHMS632230-supplement-2.pdf]

***Supplementary Table 2: The optimal RBS sequence for each integrase***

**Table 2:** The optimal RBS sequence for each integrase

| Name  | Optimal RBS sequence                      | Translation Initiation rate <sup>a</sup> |
|-------|-------------------------------------------|------------------------------------------|
| Int2  | aacatagcgaatcgtaaggagttaaaag <b>atg</b>   | 7965                                     |
| Int3  | tcacacaggaagaaggctcg <b>atg</b>           | 15                                       |
| Int4  | agtaatttcaacacaataactaggattcga <b>atg</b> | 2363                                     |
| Int5  | cagaggaaggaggctcg <b>atg</b>              | 529                                      |
| Int7  | agtaatttcaacaaaataactaggattcga <b>atg</b> | 472                                      |
| Int8  | aaaacaataactaggattcga <b>atg</b>          | 4                                        |
| Int9  | tcacacaggatgaagcctag <b>atg</b>           | 13                                       |
| Int10 | tcaaacaggaagaaggctag <b>atg</b>           | 308                                      |
| Int11 | tcaaacaggacggaggctag <b>atg</b>           | 221                                      |
| Int12 | acacaggaagaaggctcg <b>atg</b>             | 40                                       |
| Int13 | agtaatttcaacaaaataacgagcattcga <b>atg</b> | 1473                                     |

a. Calculated using the RBS calculator v1.1 (au)<sup>4</sup>.

**Supplementary Table 3: Recombinases and recognition sites used to build memory switches**

**Table 3.** Recombinases and recognition sites used to build memory switches

| Name  | NCBI No.               | attB sequence <sup>a,b</sup>                                                | attP sequence <sup>a,b</sup>                                                 |
|-------|------------------------|-----------------------------------------------------------------------------|------------------------------------------------------------------------------|
| Int2  | CBG73463               | ggacggcgcagaaggggagtagctctt <b>cgcc</b> ggaccgtcgacatactgctcagctcgtc        | gctcatgtatgtgtctacgcgagattc <b>cgcc</b> cgagaactctgcaaggcaactgctcttggt       |
| Int3  | NP_268897 <sup>1</sup> | gtttgtaaaggagactgataatggcatgtca <b>actataact</b> cgctcggtaaaaagcattcttat    | atggataaaaaatacagcgtttttcatgtca <b>actataact</b> agttgtagtgctaaataatgctt     |
| Int4  | YP_002747001           | ttccaaagagcgcaccaacgcgacctgaa <b>attg</b> aataagactgctgcttgtgtaaaggcgatgatt | aaaaattacaagttttcaacccttg <b>attg</b> aattagcggtoaaaataatttgaattcgttt        |
| Int5  | BAF03598               | gagcgcggatcagggagtggaacg <b>ctggg</b> agcgtacacgctgtggctgcggtcggtgc         | ccctaatacgcgaagtcgataactct <b>ctggg</b> agcgttgacaacttgcgcaccctgatctg        |
| Int7  | YP_003251752           | agacgagaaaacgttccgtccgtctgggtcag <b>tg</b> ggcaagtgtatgacgggtcgtccgtt       | gtgtataaacctgtgtgagagtttaagtttaca <b>tg</b> ccctaaccttaacttttacgcaggttcagctt |
| Int8  | BAE05705               | caatcatcagataactatggcggcagctgca <b>ta</b> ccacggttgtatcccgtctaaagtactcgt    | ttaataaactatggaagtatgtacagctt <b>gca</b> atgttgagtgacaaaactccataaaaaat       |
| Int9  | BAF67264               | tttataatgcaaaaaataatggcgaac <b>agg</b> taactggatacctcatccccaattaaaatttg     | gtggtgtttttgtggaagtgtgtat <b>agg</b> taactgcatagttattccgaactccaatta          |
| Int10 | YP_003880342           | agcacgctgataatcagcaagaccacca <b>ca</b> tttccaccaatgtaaaagctttaaccttagc      | ggaaaaataaataatttttagtaacct <b>ca</b> ctcaatcaaggatagtaaaactctcactctt        |
| Int11 | YP_001886479           | atggatttgcagattcccagatgccc <b>ct</b> acgaaagaggtacaaaactttattggaattaaat     | gtttatagtttactaataagacgctctca <b>cc</b> ataaagctctattagtaaacatattccaact      |
| Int12 | YP_005759947           | gttcgtggtaactatgggtgtacaggtg <b>cc</b> acattagttgtaccatttatgtttatgtggttaac  | ttttgtatgttagttgtgctactgggtag <b>ac</b> ctaaatagtgacacaactgctattaaaatttaa    |
| Int13 | YP_001376196           | gcatacattgtgtgtttttccagat <b>cc</b> agttggtcctgtaaatataagcaatccatgtgagt     | caataacggtgtgtattttagaact <b>gca</b> cgttgttttagtaacataaatacaactccgaata      |
|       |                        | IRL sequence                                                                | IRR sequence                                                                 |
| HbiF  | ABB83955 <sup>5</sup>  | aatacaagacaattggggccaaactgtccatcat                                          | ctctatgagtcaaaatggcccaaatgtttcatctttg                                        |
| FimE  | CAA27561 <sup>6</sup>  | aatacaagacaattggggccattttgactcatagag                                        | atgataggacagtttgcccaaatgtttcatctttg                                          |

a. The core sequence is shown in green.

b. The recognition sites of Int3, 5, HbiF and FimE are from literatures.

**Supplementary Table 4: Sequences of genetic parts used in this work**

**Table 4.** Sequences of genetic parts used in this work

| Part name                                                                                               | Type                   | DNA sequence                                                                                                                                                                                                                                                                                                                                                                                                                                                                                                                                                                                                                                                                                                                                                                                                                                                                                                                                                                                                                                                                                        |
|---------------------------------------------------------------------------------------------------------|------------------------|-----------------------------------------------------------------------------------------------------------------------------------------------------------------------------------------------------------------------------------------------------------------------------------------------------------------------------------------------------------------------------------------------------------------------------------------------------------------------------------------------------------------------------------------------------------------------------------------------------------------------------------------------------------------------------------------------------------------------------------------------------------------------------------------------------------------------------------------------------------------------------------------------------------------------------------------------------------------------------------------------------------------------------------------------------------------------------------------------------|
| BBa_J23119                                                                                              | promoter               | ttgacagctagctcagtcctaggtataatgctagc                                                                                                                                                                                                                                                                                                                                                                                                                                                                                                                                                                                                                                                                                                                                                                                                                                                                                                                                                                                                                                                                 |
| BBa_J23101                                                                                              | promoter               | tttacagctagctcagtcctaggtattatgctagc                                                                                                                                                                                                                                                                                                                                                                                                                                                                                                                                                                                                                                                                                                                                                                                                                                                                                                                                                                                                                                                                 |
| P <sub>Bad</sub>                                                                                        | promoter <sup>7</sup>  | gaaaccaaattgtccatattgcatcagacattgcccactgctgcttttactggctcttctcgctaaccacacgggtaacc<br>cgcttattaaaaagcattctgttaacaaagcgggaccaaagccatgacaaaacgcgtaacaaaagtgtctataatcacggcag<br>aaaagtccacattgattatgtgacggcgtcacactttgctatgcatagcattttatccataagattagcggatcctacc<br>tg                                                                                                                                                                                                                                                                                                                                                                                                                                                                                                                                                                                                                                                                                                                                                                                                                                    |
| P <sub>Tac</sub>                                                                                        | promoter <sup>8</sup>  | tgttgacaattaatcatcggctcgtataatgtgtggaattgtgagcgtcacaatt                                                                                                                                                                                                                                                                                                                                                                                                                                                                                                                                                                                                                                                                                                                                                                                                                                                                                                                                                                                                                                             |
| P <sub>Tet</sub>                                                                                        | promoter <sup>8</sup>  | tactccaccgttggctttttccctatcagtgatagagattgacatccctatcagtgatagagataatgagcac                                                                                                                                                                                                                                                                                                                                                                                                                                                                                                                                                                                                                                                                                                                                                                                                                                                                                                                                                                                                                           |
| P <sub>SrpR</sub>                                                                                       | promoter <sup>8</sup>  | tctatgattggtccagattcgttaccaattgacagctagctcagtcctaggtatatacatacatgcttgttgtttaa                                                                                                                                                                                                                                                                                                                                                                                                                                                                                                                                                                                                                                                                                                                                                                                                                                                                                                                                                                                                                       |
| P <sub>BM3R1</sub>                                                                                      | promoter <sup>8</sup>  | aatccgctgtagaggtctgattcgttaccaattgacgggaatgacggttcattccgataatgctagc                                                                                                                                                                                                                                                                                                                                                                                                                                                                                                                                                                                                                                                                                                                                                                                                                                                                                                                                                                                                                                 |
| P <sub>PhIF</sub>                                                                                       | promoter <sup>8</sup>  | cgacgtacgggtggaatctgattcgttaccaattgacatgatacgaacgtaccgtatcgttaagggt                                                                                                                                                                                                                                                                                                                                                                                                                                                                                                                                                                                                                                                                                                                                                                                                                                                                                                                                                                                                                                 |
| RiboJ                                                                                                   | insulator <sup>9</sup> | agctgtcaccggatgtgcttccggctctgatgagtcggtgaggacgaaacagcctctacaaaataatttgtttaa                                                                                                                                                                                                                                                                                                                                                                                                                                                                                                                                                                                                                                                                                                                                                                                                                                                                                                                                                                                                                         |
| SarJ                                                                                                    | insulator <sup>9</sup> | agactgtcgcggatgtgtatccgacctgacgatgcccacaaaggccgaaacagtcctctacaaaataatttgtttaa                                                                                                                                                                                                                                                                                                                                                                                                                                                                                                                                                                                                                                                                                                                                                                                                                                                                                                                                                                                                                       |
| ScCJ                                                                                                    | insulator <sup>9</sup> | agatgctgtagtgggatgtgtctcacctgaagagtacaaaagtcgaaacggtatcctctacaaaataatttgtttaa                                                                                                                                                                                                                                                                                                                                                                                                                                                                                                                                                                                                                                                                                                                                                                                                                                                                                                                                                                                                                       |
| LtsvJ                                                                                                   | insulator <sup>9</sup> | agtacgtctgagcgtgatacccgctcactgaagatggcccgtagggccgaaacgtacctctacaaaataatttgtttaa                                                                                                                                                                                                                                                                                                                                                                                                                                                                                                                                                                                                                                                                                                                                                                                                                                                                                                                                                                                                                     |
| D/E20                                                                                                   | spacer <sup>10</sup>   | agttcgtgagagcgataac                                                                                                                                                                                                                                                                                                                                                                                                                                                                                                                                                                                                                                                                                                                                                                                                                                                                                                                                                                                                                                                                                 |
| Sequence of the reporter for characterization of the integrases (with the example of Int2) <sup>a</sup> | sequence               | ttgacagctagctcagtcctaggtataatgctagcagttcgtgagagcgataacggacggcgcagaaggggagtagctctt<br>cgccggaccgtcgacatcactgctcagctcgtcttaagcgtagtttctgctgcttggctgagccttttggatagttcatcca<br>tgccatgtgtaaacccagcagctgttacaacctcaagaaggaccatggtgctctctttctggtgggactttcgaaaagggc<br>agattgtgtggacaggtaatgggtgtctggttaaaaggacagggccatcgccaattggagatatttgggtgataatggctgct<br>agttgaacgcttccactctcaatggtgtgcttaatttgaagtttaactttgattccattcttggttgtctgcatcgtgag<br>atcacattgtgtgattatagttgtattccaactgtgtccaagaatgtttccatctctttaaatacaactccttttaactc<br>gattctatatacaagttgatcaccttcaaacctgactcagcagcgtgtcttatagttcccgctcatcttggaaaaatagtt<br>cttctcgtacataaacttcgggcatggcaactctgaaaaagtcagcggcttccatagatctgggtatcttggaaaagcatt<br>gaaacccaataagtcaaagtagtgacaaggtgtggccatggaaacggtagtttccagtagtcaaaaataatgaaaggttaag<br>tttccgtagctgcatcaccttccacctctccactgacagaaaaatttggccattacattaccatcctaatccaacaaga<br>attgggacaactccagtcgaaaagttctctccttactcatctagttattctcctcttctctgagattaaaacaaaatttt<br>gtagaggtgttctgctctcagcgactcatcagaccggaaagcacatccgggtgacagctagccaagagcagtgctctgcaga<br>agttctcgggagagaatctcgcgtagacacatacatgac |
| <i>gfpmut3</i>                                                                                          | gene <sup>11</sup>     | atgagtaaggagaagaacttttcaactgagttgtocaaattctgttgaattagatggtaatgttaatgggcacaaaat<br>ctgtcagtgagaggggtgaaggtgatgacgacatacggaaaacttacccttaaatttatttgcactactggaacactaccgt<br>tccatggccaacactgtcactacttgaactatggtgttcaatgctttcaagataccagatcataatgaaacggcatgac<br>ttttcaagagtgccatgcccgaaggttatgacagaaagaaactatattttcaaaagtacgaggaactataagacacgtg<br>ctgaagtcaggttgaaggtgatacacttgttaatagaaatcgagttaaaaggtatgtattttaaagaagatgaaacattct<br>tggacacaagttggaatacaactataactcacacaagtatacatatgagcagacaaacaaaagaatggaatcaaaagttaac<br>ttcaaaaattagacacaaactgaaagtggaagcgttcaactagcagaccattatcaacaaaataactccaattggcgtatggcc<br>ctgtccttttacagacacacattacctgtccacacaaatctgccccttccgaaagatcccaacgaaaagagagaccacatggt<br>cctcttgagtttgaacagctgctgggatatacatggcatggatgaactatacaaaaaggcctgcagcaaacgacgaaaaac<br>tacgcttaa                                                                                                                                                                                                                                                                                              |
| <i>yfp</i>                                                                                              | gene <sup>11</sup>     | atgggtgagcaagggcgagagctgttccacggggtggtgccatcctggtcgagctggacggcagcgtaaacggccacaagt<br>tcagcgtgtccggcgagggcgagggcgatgcccactacggcaagctgacccctgaagttcatctgacacacggggtgctgccc<br>cgtgcccctggcccaccctcgtgaccaccttccggctacggcctgcaatgcttgcggcctacccccgaccacatgaaagctgac<br>gacttctcaagtccgcatgcccgaaggtcactgcccagggcgcacacctcttctcaaggacgacggcaactacaagacc<br>cgccggaggtgaagttcgaagggcgacacctggtgaaccgcatcgagctgaaaggtgaaaggtgaaaggtgaaaggtgaa<br>cctggggcacaagctggagtaacaactacaacgcaacacgtctatcatgcccgacaagcagaagaacggcatcaaggtg<br>aacttcaagatccgccaacaacatcgaggacggcagcgtgacgctcggcagcaactaccagagaaccccccatcgccgacg<br>gcccgtgctgctgcccgaacaacactaactgagctaccagtcgcccctgagcaaaacccccgagagacggcagatcacat<br>ggtcctgctggagttcgtgaccgcccgggatcactctcggcatggacgagctgtacaagtaa                                                                                                                                                                                                                                                                                                                               |
| <i>mrfp1</i>                                                                                            | gene <sup>12</sup>     | atggcttctccgaagcgttatcaaaaggttcatgctgttcaaaagttcgtatggaaggttccggttaacgggtcagcagttcg<br>aaatcgaaaggtgaaaggtgaaaggtcgtccgtaacgaaggtaccagaccgctaaactgaaagtaccacacgggtggtccgctgccc<br>gttccgttgggacatcctgtcccgcagttccagtagcgttccaaaagcttacgttaaacacccggctgacatcccggactac<br>ctgaaactgctctcccgaaggtttcaaatgggaacgtgttatgaaactcgaagacgggtggtgtgttaccggttaccaggt<br>actcctcccctgcaagacgggtgagttcactcaaaaagttaaaactcgtggtggttcaactcccgtcagcgttccggttatgca<br>gaaaaaaacatgggttgggaagcttccaccgaacgtatgtaccgggaagacgggtgctctgaaaggtgaaatcaaaatgctg<br>ctgaaactgaaagacgggtggtcactacgacgctgaagttaaaacacacacatggtcaaaaaacgggttcagctcgggggtg<br>cttaaaaaacggacatcaaaactggaacatcacctcccacaacgaagatcacccatcgtgaaacagtagcaacgctgctgaaag<br>tcgtcactccaccgggtgcttaataa                                                                                                                                                                                                                                                                                                                                                 |
| <i>araC</i>                                                                                             | gene <sup>7</sup>      | atggctgaaagcgaataatgatcccctgctgcccggatactcgtttaatgccatctggtggcgggtttaaaccgagattgagg<br>ccaacgggttatctcogattttttatcgaccgacccgctgggaatgaaaggtataatctcactcaccatccacacgggtggtccgctgccc<br>ggtggtgaaaaatcagggacgagaatttgtttgccgaccgggtgatatttctgcttcccgcaggagagatcactactac<br>ggtcgtcactcggagggctcggcaatggtatcaaccagtggtttacttctcgtccgcccctactggcatgaatggtctaaact<br>ggcgtcaaatatttcccaatacggggtcttctgcccggatgaagcgcaccggcatttcagcgcctggttgggcaaat<br>cattaacgcccggcaaggggaagggcgtatctcggagctgctggcgataaatctgcttgagcaatgttactcggcggcgtg                                                                                                                                                                                                                                                                                                                                                                                                                                                                                                                                                                  |



*int4*

gene

tcgtcagacctatggttctgtgaataaaaccgaaagcctggcagctcgtagcgtgaaataattacaacaatcagaaaatctgc  
aacaccggctcgtatgagaaaaaacacatcagaaaatattgattgattgctgtacaaactgcagcagcgtataaaagagtac  
tgaaaaaatcaaaaaagatgataacatttctgattactcgcgtgaaaaaagaaattgaaatcattgataaaaaagattaa  
tcgcctgaatgatctgtatattaacgacctgatcgtatcgcgaaactgaaaaaggatcgaagaactgaaaccctgaaa  
gatgactacaacaaggccatcaactgaactatctggacaaaaaacgagaatagcctgggtatgctgatggataatctgg  
atattcgtaaaaagcagctatgatgtgcagagccgtattgtgaaacagctgatgtatcgtgttgaagtgaccatggataat  
tgatatcatttttaagttctaa  
atgattaccaccctgaaagtgcaatttattgtgcgtgttagcaccaccaatcaggcagaagaaggttatagcattcagggtc  
agattgatagcctgatcaaatattgtgaagcaatgggctggatcatctatgaagaataaccgatgcaggttttagcgggtg  
taaaattgatcgtccggcaatgagcaaacctgataccgatgccaacaataaacctttgataccatcctggtgtataaactg  
gatcgtctgagccgtagcgtctgtgataccctgtatctggttaaagatggttcaaccagaacaacatccattttgttagcc  
tgcaagaaacattgataccagcagcgaatgggtaacctgtttctgcaactgctgagcgaatggcagaatttgaacctgga  
gcagattaccgaactgatgaccatgggcaaaattggctgctgcaaaaagcgttaaaacctggcattggacctatcccgcttt  
ggttatgattacaacaaagaaaaaggcgaactgtctggatccggcaaaagcaccgatgtgaaatgatctataccgatt  
atctgaaaggcagcagcctcagaaaaactggtgataaaactgaataaaatggatataaatggcaaaagattgcaactggtttcc  
gcatggtgttaaacatctgctggataatccggtgtattatggtatgaccctgataaaacaataaacctgtttccgggtatcat  
cagccgatcattaccaaaagactgtctgataaaaccagcgtgaaactgagcgtcagcgtcgtcgtggttatgaaagaaatcatt  
atcagattccgcttcaggccaaatcactgtagcaaaatctctgctgtgcaaaatctctgctgtgcaaaatcagcgtggaact  
gggtcgtccgctgaaaaaagaggttaacgtagcaaaaaatctattgctgcaatagcctgcaaaactgacccgcaagcgt  
gatacaccgctgtatgtagcaaaaaccctggaagattatgctgctgcaatgaaatggcaaaaactcagaagaatccagagcattg  
caagtcgcaaaaacataattgaaatcagcagctgaaatacaaacgcaaacctgcaaaccaacatacaaacctgaaatccgcttaa  
tcagctgtccaagctgaaataatctgtatctgaatgatctgatcagctggaagatcgtgaaaccagacaaatccctgatt  
gcaaaaaaacgctgctggaataaactggaactgataaaactgataacgatgtagctggtgcaaaagaaactatgtagcag  
actttctgctgagcagcgtgttggaccatggattatgaaaggtcagaataatgcaatgcaactgctggaactgctcagcgtgttaa  
agttgatcgcgataacatcgatataccactggacccttttaa  
atgctggttatgaccaccgaaaccggctccgcatcctgcaagctctgattgaacctgttttctgctgtaaaagcaaacgattaaaa  
gcccgtgcaaatggtgcaagctcagcgtcgttaacaagaattagcattgcaagcaaacaccctgggtcgtaaaagttgcaagc  
actgctgggtatgcaagttcgtcattgttgaagaagttggtgcaagcagcctttctgtaaggtgaaagcagcgtgatgat  
cagagcaaacgactgaaagccctggaagcgggtgagttggtgcaactggtggttatcgtgcaactgctggtggtatcgtggtg  
gtgcccgtgcaattctgaaaattatcgaaccggaagatggtatgctcgtcgtctgctgtttggtgggtagaagataccgg  
tcgctccggttctggatagcacaataaacctgtagcgggtgaaactgctcgtgcaagaagcagcgaagaaagcagaa  
aaactgagcgaacgctgtctgtagatacaaacgcaactcagcgtgaaaaatggtgaaatgggttaagcccgtgcaactgctggtc  
tgcgtgttctggttaccgttagtgatgaagaggtgatgaatgatgaaactgcaagcagcagatgtagaagatgc  
gggtgctcgtgattgaccaaagcagaagcagccctgctggttttaccctgcccgttatccgatcgtcgtgagctatgca  
ggcaccgcaactgcaatgaaatccctgaaatccgagcccgaccggtggttgcagttaccgttaccgtcgtgataatga  
ttcagaatccggcatatgcccgttggcagaccacaggtcgtcaggatggttaaacagcgtcgtctgacctttataaccggtga  
aggtaaacgtgttagcgttatgcatggtcctccgctggtgaccgatgaagaacaagaagccgcaaaagcagccgttaaaggt  
gaagatggtgttgggttccgctggtgtagcagatcagatgataccctgcaaacactcgtgagcgtcgtctgctgctgtc  
ccgggttgggtgtagctgtagctatagcggtaagttatcgtgttggcgtgagcagctgtaaaggtggttgcctggcacc  
gacctatgttgcagctaaaagctggaagaatattgtgcatctcgttgggcaagaaatgcaagcaagcgaacccggtatg  
ccgtttgttattgcaagttgcagatcgtcgtgcaagcactgaccatccgcaaacgcaagcaagatgcaaaagcgtgcaaaagccg  
cagttcgtgaaagcgaaaaaatctgggtgcccctgctgctgtagcagaaatggtgtttatgatggtcggcagaaacagtt  
ttttccccctgcatcaagaagcactgagcaccctgagcagcccaagatgcaattagcgaagcagcgcgaagcagca  
gttgatgtagcctggattgtgtagcagcagatattgaagaactgtgctgctgctgcaaacctgcaagcaccctgcaatgcaat  
ttgatcctgcatcgatgaaatttgggttgaaaaagccagcgtggtcgtccgtttgatggtgatgaaaccgttaaaatcaa  
atgggagcccgctacctaa

*int5*

gene

atgaaagtggccatttattgtctggttagcaccgatgaacaggccaaaagaggttttagcattccggcagcagcgtgaaactc  
tgccgtgcaattttgtgcaagcagggttgggaaattgtgcaagaatataatgaagaaggttgagcgcgaaagatctggatcg  
tccgagatgcaagcgtctgctgaaagatatacaaaaaggcaacatgataattgtgctggtgtatcgtctggtcctgacc  
cgtagcgtctctggatctgtatctgctgctgcaagcctttgaaaaatacaaatggtgcaattctgtagcgcaccgaaagttatg  
ataccagcaccgcaatgggtcgtctggttattaccctggtgcaagcactggcagcagtggaactcggcagaacgtgaaatcggcagaacg  
tgttaaatttggtatcagcagatgatcagtagaaggtaaaaaccgggtggtcattagcccgtatggttacaatttgataaa  
gactcaattgcaccattattgaggaagaagcagcagctgttctgtagatctatcgcagatgattgtgaggttatggctatc  
gtagcattgcagatcgtcgaatgaactgatggttaaacccgctatgccaagaatggaatcataaatagcgtgctgtagat  
cctgaccaacgatctatattggaccctatcgttgggtgataaagttgttccgaataatcatccgctatatttagcgaa  
accctggtcaaaaaagccgaaagaaaaagaaaaaacctggcgtgtagcgtgaaactggaataattctggttaaccggtc  
tgctcagctgtggttaattgtggtggccataaaatgcaagggccattttgataaacgtgagcagaaaaacattaccggtgtac  
caatgtcaccgcatatacaacgaaaaaacattctggaaccgctgctggatgaaatcagctgctgattaccagcaaaagaa  
tactttatgagcaaatcagcagaccgctatgatcagcaagaggttggtaggttagcgcactgacaaaagaaactggaaaaaa  
tcaaacgccaagaaagaaatggtacgatctgtatattggtgatcgtgaaaccgctatccgaaagaaagactgtttgcaaaat  
taacgaactgaacaaaaagaaagaaatctatagcaagctgagcgaagtggaagaagataaagaaccggttgaagaaagaa  
ataaacgctgagcaaaatgatcgattttaaaccagcagtttgagcagggcaacgacttaccaaaaagagcgtcgtcttca  
gcatctcgaagaaatggtgatttctcgcgagaaagcagctgaaaaaaatcaccctggattacaccctgaaatata  
atgaaagtggccgtttattgtcgtgttagcaccctggaacgaaagaacatggctcatagcattgaaagaacaagagcgtaaac  
tgaaaagctctcgcgataataatgattggaccgctgtagatacctatacagatgcaaggttatagcgggtgcaaaaactgtagc  
tccggaactgcaagcgtctgatgaatgatatacaaaatttgatctggtgctggtgtataaacctggatcgtctgaccctgta  
gtctgtagctgctggaccctgctgaaatcttgaaaaaaatgatgtagcttctgtagcgcaccgaaagtttatgatacca  
ccaccgcaatgggtcgtctgtttgttaccctggttgggtgcaatggcagaatgggaaactggaaccattcgtgaaaccgca  
gatgggtaaactggcagcactcgttaaggtatattgctgaccaccctccgcttttatgatcagcgtggtgataaagtt  
gtgcccgaacaaatcaaaagcgttattctgtgggcatatgacgaagcaatgaaaggtcagagcgcgcaaaagcaattgcaagca  
aactgaaatcagcagataatccgctcgaataatcaccagtgccaggtgcaactgcaactcctgctgctgctgctgctgctg  
taccctggtcattttgattgggtggtgctgcatattgaaaataaccatgaaaccgcatatcaccgatgagatgtagagaaa  
gttaagatcgcctgaatgaaacgctgaaacccaaaaaagttcgtcataaccagcattttctggtgcaaacctgtttgtccgg  
tttgaatgcaagcctgaccctgaaatgcaacataaaaaagaaagcaaatgcaagcgtatctgtgaaacagctactactgca  
caactgtaaggttaccgcaatctgaaacccggtgatacaaaagaaaaagaggtgataaagtttttacaattatctgaaa  
cgctcagatctggaaaaaatgaggttaccagaacgaaacgaaaccgaaatcaccatcagatcaataaagttatggaac  
agcccaaacgctaccataaacctgtagcaagcgtctgtagcaagaagatgaaactgctgcaactgtagcaagaaaccgctca  
gaccattgcccgaatataaaaaacagaatgaaacccgcaaggtgaagcagatgatcgaagatatacaaacgataaagat  
ctgctgttagaaaatggtgataacgctcagtagaagataaagagcatttatacaaacctgataaaacactctattttg  
aatatctattggcaccggttaaccagcagcgttaaacgtaaacctgaaatcagagcctgaaattctatttaa

*int7*

gene

atgaaagtggccatttattgtctggttagcaccgatgaacaggccaaaagaggttttagcattccggcagcagcgtgaaactc  
tgccgtgcaattttgtgcaagcagggttgggaaattgtgcaagaatataatgaagaaggttgagcgcgaaagatctggatcg  
tccgagatgcaagcgtctgctgaaagatatacaaaaaggcaacatgataattgtgctggtgtatcgtctggtcctgacc  
cgtagcgtctctggatctgtatctgctgctgcaagcctttgaaaaatacaaatggtgcaattctgtagcgcaccgaaagttatg  
ataccagcaccgcaatgggtcgtctggttattaccctggtgcaagcactggcagcagtggaactcggcagaacgtgaaatcggcagaacg  
tgttaaatttggtatcagcagatgatcagtagaaggtaaaaaccgggtggtcattagcccgtatggttacaatttgataaa  
gactcaattgcaccattattgaggaagaagcagcagctgttctgtagatctatcgcagatgattgtgaggttatggctatc  
gtagcattgcagatcgtcgaatgaactgatggttaaacccgctatgccaagaatggaatcataaatagcgtgctgtagat  
cctgaccaacgatctatattggaccctatcgttgggtgataaagttgttccgaataatcatccgctatatttagcgaa  
accctggtcaaaaaagccgaaagaaaaagaaaaaacctggcgtgtagcgtgaaactggaataattctggttaaccggtc  
tgctcagctgtggttaattgtggtggccataaaatgcaagggccattttgataaacgtgagcagaaaaacattaccggtgtac  
caatgtcaccgcatatacaacgaaaaaacattctggaaccgctgctggatgaaatcagctgctgattaccagcaaaagaa  
tactttatgagcaaatcagcagaccgctatgatcagcaagaggttggtaggttagcgcactgacaaaagaaactggaaaaaa  
tcaaacgccaagaaagaaatggtacgatctgtatattggtgatcgtgaaaccgctatccgaaagaaagactgtttgcaaaat  
taacgaactgaacaaaaagaaagaaatctatagcaagctgagcgaagtggaagaagataaagaaccggttgaagaaagaa  
ataaacgctgagcaaaatgatcgattttaaaccagcagtttgagcagggcaacgacttaccaaaaagagcgtcgtcttca  
gcatctcgaagaaatggtgatttctcgcgagaaagcagctgaaaaaaatcaccctggattacaccctgaaatata  
atgaaagtggccgtttattgtcgtgttagcaccctggaacgaaagaacatggctcatagcattgaaagaacaagagcgtaaac  
tgaaaagctctcgcgataataatgattggaccgctgtagatacctatacagatgcaaggttatagcgggtgcaaaaactgtagc  
tccggaactgcaagcgtctgatgaatgatatacaaaatttgatctggtgctggtgtataaacctggatcgtctgaccctgta  
gtctgtagctgctggaccctgctgaaatcttgaaaaaaatgatgtagcttctgtagcgcaccgaaagtttatgatacca  
ccaccgcaatgggtcgtctgtttgttaccctggttgggtgcaatggcagaatgggaaactggaaccattcgtgaaaccgca  
gatgggtaaactggcagcactcgttaaggtatattgctgaccaccctccgcttttatgatcagcgtggtgataaagtt  
gtgcccgaacaaatcaaaagcgttattctgtgggcatatgacgaagcaatgaaaggtcagagcgcgcaaaagcaattgcaagca  
aactgaaatcagcagataatccgctcgaataatcaccagtgccaggtgcaactgcaactcctgctgctgctgctgctgctgctg  
taccctggtcattttgattgggtggtgctgcatattgaaaataaccatgaaaccgcatatcaccgatgagatgtagagaaa  
gttaagatcgcctgaatgaaacgctgaaacccaaaaaagttcgtcataaccagcattttctggtgcaaacctgtttgtccgg  
tttgaatgcaagcctgaccctgaaatgcaacataaaaaagaaagcaaatgcaagcgtatctgtgaaacagctactactgca  
caactgtaaggttaccgcaatctgaaacccggtgatacaaaagaaaaagaggtgataaagtttttacaattatctgaaa  
cgctcagatctggaaaaaatgaggttaccagaacgaaacgaaaccgaaatcaccatcagatcaataaagttatggaac  
agcccaaacgctaccataaacctgtagcaagcgtctgtagcaagaagatgaaactgctgcaactgtagcaagaaaccgctca  
gaccattgcccgaatataaaaaacagaatgaaacccgcaaggtgaagcagatgatcgaagatatacaaacgataaagat  
ctgctgttagaaaatggtgataacgctcagtagaagataaagagcatttatacaaacctgataaaacactctattttg  
aatatctattggcaccggttaaccagcagcgttaaacgtaaacctgaaatcagagcctgaaattctatttaa

*int8*

gene

atgaaagtggccatttattgtcgtgttagcaccgatgaacaggccaaaagaggttttagcattccggcagcagcgtgaaactc  
tgccgtgcaattttgtgcaagcagggttgggaaattgtgcaagaatataatgaagaaggttgagcgcgaaagatctggatcg  
tccgagatgcaagcgtctgctgaaagatatacaaaaaggcaacatgataattgtgctggtgtatcgtctggtcctgacc  
cgtagcgtctctggatctgtatctgctgctgcaagcctttgaaaaatacaaatggtgcaattctgtagcgcaccgaaagttatg  
ataccagcaccgcaatgggtcgtctggttattaccctggtgcaagcactggcagcagtggaactcggcagaacgtgaaatcggcagaacg  
tgttaaatttggtatcagcagatgatcagtagaaggtaaaaaccgggtggtcattagcccgtatggttacaatttgataaa  
gactcaattgcaccattattgaggaagaagcagcagctgttctgtagatctatcgcagatgattgtgaggttatggctatc  
gtagcattgcagatcgtcgaatgaactgatggttaaacccgctatgccaagaatggaatcataaatagcgtgctgtagat  
cctgaccaacgatctatattggaccctatcgttgggtgataaagttgttccgaataatcatccgctatatttagcgaa  
accctggtcaaaaaagccgaaagaaaaagaaaaaacctggcgtgtagcgtgaaactggaataattctggttaaccggtc  
tgctcagctgtggttaattgtggtggccataaaatgcaagggccattttgataaacgtgagcagaaaaacattaccggtgtac  
caatgtcaccgcatatacaacgaaaaaacattctggaaccgctgctggatgaaatcagctgctgattaccagcaaaagaa  
tactttatgagcaaatcagcagaccgctatgatcagcaagaggttggtaggttagcgcactgacaaaagaaactggaaaaaa  
tcaaacgccaagaaagaaatggtacgatctgtatattggtgatcgtgaaaccgctatccgaaagaaagactgtttgcaaaat  
taacgaactgaacaaaaagaaagaaatctatagcaagctgagcgaagtggaagaagataaagaaccggttgaagaaagaa  
ataaacgctgagcaaaatgatcgattttaaaccagcagtttgagcagggcaacgacttaccaaaaagagcgtcgtcttca  
gcatctcgaagaaatggtgatttctcgcgagaaagcagctgaaaaaaatcaccctggattacaccctgaaatata  
atgaaagtggccgtttattgtcgtgttagcaccctggaacgaaagaacatggctcatagcattgaaagaacaagagcgtaaac  
tgaaaagctctcgcgataataatgattggaccgctgtagatacctatacagatgcaaggttatagcgggtgcaaaaactgtagc  
tccggaactgcaagcgtctgatgaatgatatacaaaatttgatctggtgctggtgtataaacctggatcgtctgaccctgta  
gtctgtagctgctggaccctgctgaaatcttgaaaaaaatgatgtagcttctgtagcgcaccgaaagtttatgatacca  
ccaccgcaatgggtcgtctgtttgttaccctggttgggtgcaatggcagaatgggaaactggaaccattcgtgaaaccgca  
gatgggtaaactggcagcactcgttaaggtatattgctgaccaccctccgcttttatgatcagcgtggtgataaagtt  
gtgcccgaacaaatcaaaagcgttattctgtgggcatatgacgaagcaatgaaaggtcagagcgcgcaaaagcaattgcaagca  
aactgaaatcagcagataatccgctcgaataatcaccagtgccaggtgcaactgcaactcctgctgctgctgctgctgctgctg  
taccctggtcattttgattgggtggtgctgcatattgaaaataaccatgaaaccgcatatcaccgatgagatgtagagaaa  
gttaagatcgcctgaatgaaacgctgaaacccaaaaaagttcgtcataaccagcattttctggtgcaaacctgtttgtccgg  
tttgaatgcaagcctgaccctgaaatgcaacataaaaaagaaagcaaatgcaagcgtatctgtgaaacagctactactgca  
caactgtaaggttaccgcaatctgaaacccggtgatacaaaagaaaaagaggtgataaagtttttacaattatctgaaa  
cgctcagatctggaaaaaatgaggttaccagaacgaaacgaaaccgaaatcaccatcagatcaataaagttatggaac  
agcccaaacgctaccataaacctgtagcaagcgtctgtagcaagaagatgaaactgctgcaactgtagcaagaaaccgctca  
gaccattgcccgaatataaaaaacagaatgaaacccgcaaggtgaagcagatgatcgaagatatacaaacgataaagat  
ctgctgttagaaaatggtgataacgctcagtagaagataaagagcatttatacaaacctgataaaacactctattttg  
aatatctattggcaccggttaaccagcagcgttaaacgtaaacctgaaatcagagcctgaaattctatttaa

|              |      |                                                                                                                                                                                                                                                                                                                                                                                                                                                                                                                                                                                                                                                                                                                                                                                                                                                                                                                                                                                                                                                                                                                                                                                                                                                                                                                                                                                                                                                                                                                                                                                                                                                                                                                                                                                                                                                                                                                                                                                                                                                                                                                                                                                                                                                                                                                                                                                                                                                                                                                                                                                                                                                                                                                                                                                                                                                                                                                                                                                                                                                                                                                                                                                                                                                                                                                                                                                                                                                                                                                                                                                                                                                                                                                                                                                                                                                                                                                                                                                                                                                                                                                                                                                                                                                                                                                                                                                                                                                                                                                                                                                                                                                                                                                                                                                                                                                                                                                                                                                                                                                                                                                                                                                                                                                                                                                                                                                                                                                                                                                                                                                                                                                                                                                                                                                                                                                                                                                                                                                                                                                                                                                                                                                                                                                                                                                                                                                                                                                                                                                                                                                                                                                                                                                                                                                                                                                                                                                                                                                                                                                 |
|--------------|------|-------------------------------------------------------------------------------------------------------------------------------------------------------------------------------------------------------------------------------------------------------------------------------------------------------------------------------------------------------------------------------------------------------------------------------------------------------------------------------------------------------------------------------------------------------------------------------------------------------------------------------------------------------------------------------------------------------------------------------------------------------------------------------------------------------------------------------------------------------------------------------------------------------------------------------------------------------------------------------------------------------------------------------------------------------------------------------------------------------------------------------------------------------------------------------------------------------------------------------------------------------------------------------------------------------------------------------------------------------------------------------------------------------------------------------------------------------------------------------------------------------------------------------------------------------------------------------------------------------------------------------------------------------------------------------------------------------------------------------------------------------------------------------------------------------------------------------------------------------------------------------------------------------------------------------------------------------------------------------------------------------------------------------------------------------------------------------------------------------------------------------------------------------------------------------------------------------------------------------------------------------------------------------------------------------------------------------------------------------------------------------------------------------------------------------------------------------------------------------------------------------------------------------------------------------------------------------------------------------------------------------------------------------------------------------------------------------------------------------------------------------------------------------------------------------------------------------------------------------------------------------------------------------------------------------------------------------------------------------------------------------------------------------------------------------------------------------------------------------------------------------------------------------------------------------------------------------------------------------------------------------------------------------------------------------------------------------------------------------------------------------------------------------------------------------------------------------------------------------------------------------------------------------------------------------------------------------------------------------------------------------------------------------------------------------------------------------------------------------------------------------------------------------------------------------------------------------------------------------------------------------------------------------------------------------------------------------------------------------------------------------------------------------------------------------------------------------------------------------------------------------------------------------------------------------------------------------------------------------------------------------------------------------------------------------------------------------------------------------------------------------------------------------------------------------------------------------------------------------------------------------------------------------------------------------------------------------------------------------------------------------------------------------------------------------------------------------------------------------------------------------------------------------------------------------------------------------------------------------------------------------------------------------------------------------------------------------------------------------------------------------------------------------------------------------------------------------------------------------------------------------------------------------------------------------------------------------------------------------------------------------------------------------------------------------------------------------------------------------------------------------------------------------------------------------------------------------------------------------------------------------------------------------------------------------------------------------------------------------------------------------------------------------------------------------------------------------------------------------------------------------------------------------------------------------------------------------------------------------------------------------------------------------------------------------------------------------------------------------------------------------------------------------------------------------------------------------------------------------------------------------------------------------------------------------------------------------------------------------------------------------------------------------------------------------------------------------------------------------------------------------------------------------------------------------------------------------------------------------------------------------------------------------------------------------------------------------------------------------------------------------------------------------------------------------------------------------------------------------------------------------------------------------------------------------------------------------------------------------------------------------------------------------------------------------------------------------------------------------------------------------------------------------------------------|
|              |      | atgaaagtggccatttatacccggttagcaccctggaacagaaagaaaggtcatagcatcgaagaacaagaacgtaaac<br>tgcgtgcatatagcgatacaacgattggaataccacaaagtttataccgtagcaggtatagcgggtgcaaaaaagatcg<br>tccggcactgcaaaaaatgctgaatgaaatgataaactcgatcgtggtggtgataaaactggatcgtcgcacccgtagc<br>gttaaagatctgctggaaaatctcggaaactggttgaaaaacaaaacgctgctgttctgtagcgcaccgaaagtttatgatacca<br>ccagtgcaatgggtcgtcgtttgttaccctgggtggtgcaatggcagaatgggaacgtaccaccattcaagaacgcaccgc<br>catgggtcgccgtgcaagcgacgctaaaggttcggcaaaaacgcttccgcttctctatctatgatcgcgtgaaatgataaatt<br>gtgccgaacgagatcaaaaaggttctcgtggtttgcagtggaagaagcaaaaaagggcaccgacctgctgaaattaccatt<br>aactgaacaacagcaaatacaagaccgctgggtgaaaaatggcatcgtagcgtgatggtaatgactgaccagtcgggt<br>tgcacgtggtcatctgggttttgggtgatattttgtgaaaaacaccacgaagcattatagcgaagaggaatgaaagaa<br>atcaagctgcgcattagcgaaaaaacaaatagcaccatgtgaaacacaacgcccattttctgtagcaaacctgctgtccga<br>attgcaatcagaactgaccctgaataccgttaaacataccggcaaaaaacaaagaggtggtgacagcaaacctgatTTTTG<br>cagcaattgcaaaaaaccccaaaaataaagaacgctgcaacatcgatgaaggtgaaagtctgaaacagttctacaactatctg<br>aagcagtttgatctgaccagctcaaaaatgaaaaccagccgaaagaatgaggatggtggcatgatattgaaaaactgc<br>gtaaagaacgtgcccgtgtcagaccctggtttatgaaaggtatgatggaataaagatgaagcctttccgatattagccgcat<br>cgataaaagaattccacgagatgaaaaacgcaagacacgataaaggcaaaacctctatgaaagatgaaaaacttc<br>aaatagcctgctgaaacggctggaaactgatggaagatgaaactgaaacccaggtttatcaagatggcgatcaaaaaatcc<br>acttgagatgtgaaagcatcaaaaggtaaacgtcagaacagcctgaaaaataccggcatcgaattctattaa<br>atgatcaccaccaataaaagtggcgtttatgtgctggttagtaccaccaatgtaagaggttgaagaggttatagcattgatgaa<br>agaaagataaaactgagcagctattgcatatcaaaagatggaacgctgcaaaaggtataccagatgggtggttttagcggtag<br>caataccgatcgtcggcactggaagcctgataaagatgcaaaaaaacgcaaatctgataccgtgctggtgataaaactg<br>gatcgtctgacccgtagccagaaagacccctgcatctgattgaaagatggtttatcaaaaatgtaattctgagcc<br>tgcaagagaaatttgataccagcaccggcttggtaaaagcaatgatggtctgctgagcgttttgacagctgaaacgtga<br>cgatgaaagaacgtatgcagctgggtaaactgggtcgtgcaaaaacgggtgcaaaaagcattgatgggcaaaaaacagcatt<br>ggctatgattatcaaaaagaacccggcaccgttaccatttaacccggcaccagcctgaccattcaaaatttatcttgaaagct<br>atctcgtggtgctgagcattaccaaacctgctgatgatctgaaatgagaatatacggcaaacctgctcggctgctatctgctg<br>agtcgtagcattctggataatccgggtttatgctggttcaaccagatgaaaggtgaaatctatccgggtgaaactgaaacg<br>attatagcaaaagagtagcagataaaaacccagcgaactgaaatctcgtcagcctaccgagcagaaaaatgtaactccgc<br>gtccgtttcaggccaaatatacctgagcgttattgcccagctggtttatgctgtagcaccctgaaatcatgctgggtgt<br>taaacgtaaaagatggtagccctgcaaaaagatgaatgctcatcagcgtctccgctgctcggctggtgttaccacctg<br>aatgatacaaaaaatgcaagcagcggcttttactcaaaagcaaaactggaacccatgctgctgaaagaaattagcaaacctgc<br>aggcagatgcagattatctggataaaactcttagcgtgataaacgcccgaacccatgctgtagagcattaaaaagcagat<br>cgaggaactgagcaaaaaactgagctcgtcgaacgactgctgataatcagatcgtatataccctggaagaactgcaagcaaa<br>agcgcagaatttatcagcatcgtggcaccctggaacccgaactggaatgatcctgcaactcgtgtaaaaaacaaacggaaag<br>cagatagcgtgaaactgctgaatgcccgaaaaagctgtagcagctgattatgagatgcagaaggttctggtctgctgcctgat<br>caataaagttaaagtaccgctgaaagatattgtgattaaattggaatactaa<br>atgctcgtgtgcaatctatattcgtgtagcaccgaagaacagggcaatgcatggtctgagcattgagcagagaaagcag<br>atctgaccgattatgcaaaaaacacaactatgagattattgattattatgtagcagcggtaaaaacccgacgtaaacgctct<br>gagcaaacgtaaaagatctgagcgtatgattgaaagatggaagctgaaacgcaaaaatgattatcaattttaccaaacctggt<br>cgtcgtgttctgtaattgctgctgattatcaaaaacaaagaggtgctggaagatcataacgttgattggaaaacacatttg<br>agaactatgataccagcaccgcaaatgctcgtcgtatataacatatacctgagcgttgcacagagtagaagcagatcgtac<br>cagcgaacgtatataacgtgctggtttgaaaacaaaactgaaagaacaaactgaaacccagcggtagcggctgctataaa<br>atcaaaagaaaaagcattatctgtagaagaaaaagcaccgactgcgaagatgctgctgattctctattatccatcaga<br>gccagcaaacggtgtttaaagaatcctgaaacaaatacaacccctgagcctgctgcaaaaaacacattcgtcgtatgctgaa<br>caagctgataattggtatctatcgcgagcagcaaaaactttgtccgctctgattgcaaaaaacaaatttgatgaagtcgag<br>ctgattctgaaacgtgcacacataaatacattccgaccaaaccgactcttctgcttaccagcctgctgatttgtaaaagat<br>gcccctataaaatgattggcaatgcccagattcgttaatacaaaagccggtgaaatgagatattctgctatcgtgcaatca<br>gagctatgcagctcatacctgctatcgtgaaagatgctcagcaaaaacaaactgaaacccatctgctgaaacacatcgaa<br>agcgaactgaaaaaattcattatgattatgaaactggaagatattccgaaagtgaaaaacaaagtgaataaaacaaatata<br>aacgcaaacctgaaaaactgaaagaactgacatacaacgactcgtgacatgacatgataaaagaagattataagaata<br>taccgaaatctgaaaccccaaaagaagaaaaatgagcagcgtaatctgagcggctgaaagatttctgaaatgagcatttc<br>aaaagcctgtagtagcagcattagtcggaagaaaaacgctcgtgctggtggtgattatagcgaatcagatgattgca<br>ataatgatataccatcattccgcatccgtaa<br>atgaaagtggccatttatacccggttagcagcgcagaaacagggcaaatgaaaggttatagcattcagcagcagaagaagaaac<br>tgatcagctattgcaaaaatccacgattggaacgagatataaagttttaccgtagcaggtattagcgggtgtagcagtaaacg<br>tccggcactgcaaaaaactgatgaaacatctgagttcatttgatctggtgctggtgataaaactggatcgtcgaacccgta<br>gtctgctgctggtgatgctggaagaaattgaaacgataaacgtagctttaaanaagccacccaaggttttgatacca<br>ccagtgcaattggcaaacctggtttataccatggttgggtgcaatggcagaatgggaacgtgaaacacattcgtgaaactgagcct<br>gtttggtgagcgtgagcagttcgtgaaagtaactatactcgtgaaagcaccgttttgctatgataaacattgaaaggtaaactg<br>caccgcaacgaaatgcaaaaagtattgactgattgtagcagctgctcaaaaaagcattagcgcgaataaaattgcaactg<br>gtctgaaatagcagcaaggtcattgctcgaacaaaaaaagcggaaatcgtgaaatagcctgattcgtctgtagcgtgagtcgg<br>tctgctggtgcataccaaatatgggtgatagctgattgaaaacaccatgaaacccggtgctgagcgaacatgattataatgca<br>atcaaacgcatcagcagcaaaaacccataaaaagcaaaagttaaacaccatgcccattttctggtggtgactggtttgctccgc<br>agtgtaactcgtcgtctgcatctgtagcagcaccggttaaaagatcgtgaaaggtataaaatagcagtgctgctgataaaatg<br>tgaacccctgagcaaaaaacaaagatggaagaatgtagcttcaacgaaagcgaagtggaaaaaacaaattcgtcaatctgctg<br>aaaagctacgagctgaaacaaattcataaccgtgaaagtggaacccggtgaaaaaaactcgagtagcagcagcaaaaatcaaca<br>aacgaaaaatcaactatacccgagctggagcctgggtctatattgaaagatgagaaatattccgagctgaggaagaaatcaa<br>cgccacaaaaaaatgatcgaagaacagaccacggagaataaacagagcgttagcaaaagagcagattcagagcattacaac<br>ttatcctgaaagctgggaagaaactgaccatcaaaagataaaagaggaactgattcgaagcagcctgtagcaaaaactggaat<br>acttcatccgaaagataaaaaacataaaacaaataccctggatatacaaatattcactttaaattctaa<br>atggcgggtgggtatctatattcgtgtagcaccgaagaacagggcaaggtcagcattgaaagccagaaaaaaaagc<br>tggcagatatttgaaatccagggttgggtgattatcgtctctatattgaaagagcagcagcagcagcaaaaatcaaatcg<br>tccgaaactgaaactgctgatggaacatctgaaaagggcaaaaatcaacatcctgctggtttatcgtcgtgattcgtcgtgacc<br>cgtagcgttattgatctgcataagctgctgaaattctgcaagaacatggttgcattttaaagcgcacccgaaacccatg<br>ataccaccgcgaatgggtgcaacacacacgctgaaatggttagcctgctgcaagctggaacagcagcaaaaatgagcgaacg<br>tattaaactgaaacccgcaacaaagtctcgttgaaggtgaaacgctggtgcaattccgtatgggttttgatctgctcagat<br>gatgagaactggtgaaaaatgaaaaagcggcattctgctggtatggtgaaacgctggaataatggttggagcgttaate<br>gcaattggaattatctgaaatcgaccaacacacgctgaaatggagccggaatgggttctcgtcgtcgtcgttaacccgcg<br>actgtatggtgcaacccgctggaatgataaaattgcccgaataacgcaagcagcattatagcaaaagcagctttaaactgc<br>ctgagcagatctcggcagctgtagcattcatcgtcgtgattgaaagcaccattatcttaccgggtgctgctgctg<br>gtccggtttgtagcagaccctgagcgtgaaatcgtttatcaaaaaacgtaaaagtgccagcaaatgtggtggtgctgta<br>tcggttgcagccgctgattaaacagaataaatacaaatcggccatggcgaagcagcgtttctgaaagcactgaaatgaaat |
| <i>int9</i>  | gene |                                                                                                                                                                                                                                                                                                                                                                                                                                                                                                                                                                                                                                                                                                                                                                                                                                                                                                                                                                                                                                                                                                                                                                                                                                                                                                                                                                                                                                                                                                                                                                                                                                                                                                                                                                                                                                                                                                                                                                                                                                                                                                                                                                                                                                                                                                                                                                                                                                                                                                                                                                                                                                                                                                                                                                                                                                                                                                                                                                                                                                                                                                                                                                                                                                                                                                                                                                                                                                                                                                                                                                                                                                                                                                                                                                                                                                                                                                                                                                                                                                                                                                                                                                                                                                                                                                                                                                                                                                                                                                                                                                                                                                                                                                                                                                                                                                                                                                                                                                                                                                                                                                                                                                                                                                                                                                                                                                                                                                                                                                                                                                                                                                                                                                                                                                                                                                                                                                                                                                                                                                                                                                                                                                                                                                                                                                                                                                                                                                                                                                                                                                                                                                                                                                                                                                                                                                                                                                                                                                                                                                                 |
| <i>int10</i> | gene |                                                                                                                                                                                                                                                                                                                                                                                                                                                                                                                                                                                                                                                                                                                                                                                                                                                                                                                                                                                                                                                                                                                                                                                                                                                                                                                                                                                                                                                                                                                                                                                                                                                                                                                                                                                                                                                                                                                                                                                                                                                                                                                                                                                                                                                                                                                                                                                                                                                                                                                                                                                                                                                                                                                                                                                                                                                                                                                                                                                                                                                                                                                                                                                                                                                                                                                                                                                                                                                                                                                                                                                                                                                                                                                                                                                                                                                                                                                                                                                                                                                                                                                                                                                                                                                                                                                                                                                                                                                                                                                                                                                                                                                                                                                                                                                                                                                                                                                                                                                                                                                                                                                                                                                                                                                                                                                                                                                                                                                                                                                                                                                                                                                                                                                                                                                                                                                                                                                                                                                                                                                                                                                                                                                                                                                                                                                                                                                                                                                                                                                                                                                                                                                                                                                                                                                                                                                                                                                                                                                                                                                 |
| <i>int11</i> | gene |                                                                                                                                                                                                                                                                                                                                                                                                                                                                                                                                                                                                                                                                                                                                                                                                                                                                                                                                                                                                                                                                                                                                                                                                                                                                                                                                                                                                                                                                                                                                                                                                                                                                                                                                                                                                                                                                                                                                                                                                                                                                                                                                                                                                                                                                                                                                                                                                                                                                                                                                                                                                                                                                                                                                                                                                                                                                                                                                                                                                                                                                                                                                                                                                                                                                                                                                                                                                                                                                                                                                                                                                                                                                                                                                                                                                                                                                                                                                                                                                                                                                                                                                                                                                                                                                                                                                                                                                                                                                                                                                                                                                                                                                                                                                                                                                                                                                                                                                                                                                                                                                                                                                                                                                                                                                                                                                                                                                                                                                                                                                                                                                                                                                                                                                                                                                                                                                                                                                                                                                                                                                                                                                                                                                                                                                                                                                                                                                                                                                                                                                                                                                                                                                                                                                                                                                                                                                                                                                                                                                                                                 |
| <i>int12</i> | gene |                                                                                                                                                                                                                                                                                                                                                                                                                                                                                                                                                                                                                                                                                                                                                                                                                                                                                                                                                                                                                                                                                                                                                                                                                                                                                                                                                                                                                                                                                                                                                                                                                                                                                                                                                                                                                                                                                                                                                                                                                                                                                                                                                                                                                                                                                                                                                                                                                                                                                                                                                                                                                                                                                                                                                                                                                                                                                                                                                                                                                                                                                                                                                                                                                                                                                                                                                                                                                                                                                                                                                                                                                                                                                                                                                                                                                                                                                                                                                                                                                                                                                                                                                                                                                                                                                                                                                                                                                                                                                                                                                                                                                                                                                                                                                                                                                                                                                                                                                                                                                                                                                                                                                                                                                                                                                                                                                                                                                                                                                                                                                                                                                                                                                                                                                                                                                                                                                                                                                                                                                                                                                                                                                                                                                                                                                                                                                                                                                                                                                                                                                                                                                                                                                                                                                                                                                                                                                                                                                                                                                                                 |
| <i>int13</i> | gene |                                                                                                                                                                                                                                                                                                                                                                                                                                                                                                                                                                                                                                                                                                                                                                                                                                                                                                                                                                                                                                                                                                                                                                                                                                                                                                                                                                                                                                                                                                                                                                                                                                                                                                                                                                                                                                                                                                                                                                                                                                                                                                                                                                                                                                                                                                                                                                                                                                                                                                                                                                                                                                                                                                                                                                                                                                                                                                                                                                                                                                                                                                                                                                                                                                                                                                                                                                                                                                                                                                                                                                                                                                                                                                                                                                                                                                                                                                                                                                                                                                                                                                                                                                                                                                                                                                                                                                                                                                                                                                                                                                                                                                                                                                                                                                                                                                                                                                                                                                                                                                                                                                                                                                                                                                                                                                                                                                                                                                                                                                                                                                                                                                                                                                                                                                                                                                                                                                                                                                                                                                                                                                                                                                                                                                                                                                                                                                                                                                                                                                                                                                                                                                                                                                                                                                                                                                                                                                                                                                                                                                                 |

---

|             |                   |                                                                                                                                                                                                                                                                                                                                                                                                                                                                                                                                                                                                                                                                                                                                                                                                                                                                                                                                                                                                                                                                                                                                                                                                                                                                                                                                                                                                                                                                                                                                                                                                                                                                                                                                     |
|-------------|-------------------|-------------------------------------------------------------------------------------------------------------------------------------------------------------------------------------------------------------------------------------------------------------------------------------------------------------------------------------------------------------------------------------------------------------------------------------------------------------------------------------------------------------------------------------------------------------------------------------------------------------------------------------------------------------------------------------------------------------------------------------------------------------------------------------------------------------------------------------------------------------------------------------------------------------------------------------------------------------------------------------------------------------------------------------------------------------------------------------------------------------------------------------------------------------------------------------------------------------------------------------------------------------------------------------------------------------------------------------------------------------------------------------------------------------------------------------------------------------------------------------------------------------------------------------------------------------------------------------------------------------------------------------------------------------------------------------------------------------------------------------|
| <i>hbiF</i> | gene <sup>5</sup> | <p>atgagcaccggttgaatttcagaccgttgaagatgaagtgatcccgaaaaaagcgaacgtgaaatgctggaagccagctgc<br/> agcaaatgcacgtaaacgtgaaaaatcagaaaagcatgggcaagcagatctgatgagcgacgatgaatttgaaaaactgat<br/> ggttgaaacccgtgaaacctacgatgaatgtaaacagaaactggaaagctgtgaggatccgatcaaaatcgatgaaacctat<br/> ctgaaagaaattgtgtatatgtttcaccagacctttaaagatctggaaagcgaaaaacagaaagaaatttatcagcaagttca<br/> ttcgcaccattcgtataaccgttaaagaacagcagccgattcgtccggataaaaagcaaaacccggtaaaaggcaaacagaaggt<br/> gattattaccgaggtggaattctaccagtaa</p> <p>atgacgagaaaaatctcacacaggatgaagtctacaggctgatggatgcagcccagagcagatgtcctttcctgaaagaatc<br/> gctgtctgattatgatggcttccattcacgggttttagggccagtgaaacttcttgatttacgtttatccgatattgatgcac<br/> tggaacaacttaatatcggcgtattaaaaatgggttctcgcacaacacatcctcttctcctgatgaatataatttgatc<br/> aagttgtggcttaagcagaggaagttaattgaaaacggagttgaaggagactggcttttctcctccggaaaacgcgcctta<br/> tcagcagacaacatTTTTTTTctatcattcgtgaggctggaaaacgtgcaggattagctgtaaaagcacatcctcatatgtt<br/> acgtcatgcctgtggtttgcctcggctgacaatgggtgcgatacccgactcttcaggattacctgggtcatcgaaatatt<br/> cagcatactgtcagatacacagccagtaatgctgctcgttttaagggggtggaaaaaaaagcctcgttaa</p> <p>atgatgcaggcggttgttacggggcaacgggagccagagattatgtcttattctgttggcatatcggcatgggatgcgta<br/> ttagtgaactgcttgatctgcattatcaggaccttgaccttaatgaaggtagaataaaatattcgcgactgaagaacggatt<br/> ttctaccgttcaccggttacgttttgatgagcgtgaagccgtggaacgctggaccaggaacgtgctaactggaagcgct<br/> gaccggactgacgctatatttattctcgcgcgggagtcggcttctcgcagcaggcctatcgcatattcgcgatgccg<br/> gtattgaagctggaaccgtaacgcagactcatcctcatatgttaaggcatgcttgcggttatgaattggcggagcgtgggtgc<br/> agatactcgtttaattcaggattatctcgggcacgaaatattcgccatactgtgcgttataccgccaagtaatgctgctcgt<br/> tttgcggattatgggaagaataatctcataaacgaaaaataaaaagagaagaggtttga</p> |
| <i>fimE</i> | gene <sup>7</sup> |                                                                                                                                                                                                                                                                                                                                                                                                                                                                                                                                                                                                                                                                                                                                                                                                                                                                                                                                                                                                                                                                                                                                                                                                                                                                                                                                                                                                                                                                                                                                                                                                                                                                                                                                     |

---

a. color code of the sequence: brown, promoter J23119; blue, spacer D/E20; green, gfp mut3; magenta, RBS; black, att B/P sites ;purple, RiboJ.



**Supplementary Table 5: Orthogonality matrix ( % ON )**

**Table 5: Orthogonality matrix (% ON)**

| Sites <sup>a</sup> |  | 2           | 3           | 4           | 5           | 7           | 8           | 9           | 10          | 11          | 12          | 13          | FimE        | HbiF        |
|--------------------|--|-------------|-------------|-------------|-------------|-------------|-------------|-------------|-------------|-------------|-------------|-------------|-------------|-------------|
| Int2               |  | <b>97.4</b> | <b>0.0</b>  | <b>0.0</b>  | <b>0.0</b>  | <b>0.0</b>  | <b>0.0</b>  | <b>0.0</b>  | <b>2.0</b>  | <b>0.0</b>  | <b>0.0</b>  | <b>0.0</b>  | <b>0.0</b>  | <b>0.0</b>  |
|                    |  | 0.7         | 0.0         | 0.0         | 0.0         | 0.0         | 0.0         | 0.0         | 1.7         | 0.0         | 0.0         | 0.0         | 0.0         | 0.0         |
| Int3               |  | <b>0.0</b>  | <b>97.3</b> | <b>0.0</b>  | <b>0.0</b>  | <b>0.0</b>  | <b>0.0</b>  | <b>0.1</b>  | <b>0.7</b>  | <b>0.0</b>  | <b>0.0</b>  | <b>0.0</b>  | <b>0.0</b>  | <b>0.0</b>  |
|                    |  | 0.0         | 0.6         | 0.0         | 0.0         | 0.0         | 0.0         | 0.2         | 0.5         | 0.0         | 0.0         | 0.0         | 0.0         | 0.0         |
| Int4               |  | <b>0.0</b>  | <b>0.1</b>  | <b>94.7</b> | <b>0.0</b>  | <b>0.0</b>  | <b>0.0</b>  | <b>0.0</b>  | <b>1.9</b>  | <b>0.0</b>  | <b>0.1</b>  | <b>0.0</b>  | <b>0.0</b>  | <b>0.0</b>  |
|                    |  | 0.0         | 0.0         | 1.7         | 0.0         | 0.0         | 0.0         | 0.0         | 1.7         | 0.0         | 0.1         | 0.0         | 0.0         | 0.0         |
| Int5               |  | <b>0.0</b>  | <b>0.1</b>  | <b>0.0</b>  | <b>93.8</b> | <b>0.0</b>  | <b>0.0</b>  | <b>0.0</b>  | <b>1.2</b>  | <b>0.0</b>  | <b>0.0</b>  | <b>0.0</b>  | <b>0.0</b>  | <b>0.0</b>  |
|                    |  | 0.0         | 0.1         | 0.0         | 3.4         | 0.0         | 0.0         | 0.0         | 0.5         | 0.0         | 0.0         | 0.0         | 0.0         | 0.0         |
| Int7               |  | <b>0.0</b>  | <b>0.0</b>  | <b>0.0</b>  | <b>0.0</b>  | <b>94.1</b> | <b>1.3</b>  | <b>0.0</b>  | <b>32.5</b> | <b>0.0</b>  | <b>0.0</b>  | <b>0.0</b>  | <b>0.0</b>  | <b>0.0</b>  |
|                    |  | 0.0         | 0.0         | 0.0         | 0.0         | 0.5         | 1.4         | 0.0         | 5.3         | 0.0         | 0.0         | 0.0         | 0.0         | 0.0         |
| Int8               |  | <b>0.0</b>  | <b>0.1</b>  | <b>0.0</b>  | <b>0.0</b>  | <b>0.0</b>  | <b>98.5</b> | <b>0.4</b>  | <b>9.5</b>  | <b>0.0</b>  | <b>0.0</b>  | <b>0.0</b>  | <b>0.0</b>  | <b>0.0</b>  |
|                    |  | 0.0         | 0.1         | 0.0         | 0.0         | 0.0         | 0.3         | 0.2         | 5.9         | 0.0         | 0.0         | 0.0         | 0.0         | 0.0         |
| Int9               |  | <b>0.0</b>  | <b>0.0</b>  | <b>0.0</b>  | <b>0.0</b>  | <b>0.0</b>  | <b>0.8</b>  | <b>69.6</b> | <b>24.6</b> | <b>0.0</b>  | <b>0.0</b>  | <b>0.0</b>  | <b>0.0</b>  | <b>0.0</b>  |
|                    |  | 0.0         | 0.0         | 0.0         | 0.0         | 0.0         | 0.7         | 5.0         | 9.7         | 0.0         | 0.1         | 0.0         | 0.0         | 0.0         |
| Int10              |  | <b>0.0</b>  | <b>92.6</b> | <b>0.0</b>  | <b>0.0</b>  | <b>0.0</b>  | <b>0.0</b>  | <b>0.0</b>  |
|                    |  | 0.0         | 0.0         | 0.0         | 0.0         | 0.0         | 0.0         | 0.0         | 6.4         | 0.0         | 0.0         | 0.0         | 0.0         | 0.0         |
| Int11              |  | <b>0.0</b>  | <b>0.3</b>  | <b>0.0</b>  | <b>0.0</b>  | <b>0.0</b>  | <b>0.6</b>  | <b>0.0</b>  | <b>8.7</b>  | <b>81.1</b> | <b>0.0</b>  | <b>0.0</b>  | <b>0.0</b>  | <b>0.0</b>  |
|                    |  | 0.0         | 0.2         | 0.0         | 0.0         | 0.0         | 0.5         | 0.0         | 3.2         | 1.8         | 0.0         | 0.0         | 0.0         | 0.0         |
| Int12              |  | <b>0.0</b>  | <b>0.3</b>  | <b>0.0</b>  | <b>0.0</b>  | <b>0.0</b>  | <b>1.5</b>  | <b>0.0</b>  | <b>9.6</b>  | <b>0.0</b>  | <b>96.0</b> | <b>0.0</b>  | <b>0.0</b>  | <b>0.0</b>  |
|                    |  | 0.0         | 0.5         | 0.0         | 0.0         | 0.0         | 1.7         | 0.0         | 3.4         | 0.0         | 0.5         | 0.0         | 0.0         | 0.0         |
| Int13              |  | <b>0.0</b>  | <b>0.2</b>  | <b>0.0</b>  | <b>0.1</b>  | <b>90.6</b> | <b>0.0</b>  | <b>0.0</b>  |
|                    |  | 0.0         | 0.0         | 0.0         | 0.0         | 0.0         | 0.0         | 0.0         | 0.1         | 0.0         | 0.1         | 0.5         | 0.0         | 0.0         |
| FimE               |  | <b>0.0</b>  | <b>0.5</b>  | <b>0.0</b>  | <b>0.0</b>  | <b>0.0</b>  | <b>97.9</b> | <b>0.4</b>  |
|                    |  | 0.0         | 0.0         | 0.0         | 0.0         | 0.0         | 0.0         | 0.0         | 0.5         | 0.0         | 0.0         | 0.0         | 0.2         | 0.2         |
| HbiF               |  | <b>0.0</b>  | <b>0.2</b>  | <b>0.0</b>  | <b>0.0</b>  | <b>0.0</b>  | <b>29.0</b> | <b>90.1</b> |
|                    |  | 0.0         | 0.0         | 0.0         | 0.0         | 0.0         | 0.0         | 0.0         | 0.1         | 0.0         | 0.0         | 0.0         | 3.3         | 2.1         |

a. The average (upper row, bold) and standard deviation (lower row) of three independent triplicates are shown.

**Supplementary Table 6: Orthogonality matrix in average fluorescence**

**Table 6: Orthogonality matrix (average fluorescence)**

|              | Sites <sup>a</sup> |             |              |              |             |             |              |              |              |              |            |              |              |
|--------------|--------------------|-------------|--------------|--------------|-------------|-------------|--------------|--------------|--------------|--------------|------------|--------------|--------------|
|              | 2                  | 3           | 4            | 5            | 7           | 8           | 9            | 10           | 11           | 12           | 13         | FimE         | HbiF         |
| <b>Int2</b>  | <b>1181</b>        | <b>9.4</b>  | <b>7.5</b>   | <b>7.2</b>   | <b>8.6</b>  | <b>13.3</b> | <b>7.7</b>   | <b>25.7</b>  | <b>7.5</b>   | <b>7.8</b>   | <b>7.3</b> | <b>7.2</b>   | <b>6.9</b>   |
|              | 73.5               | 0.9         | 0.7          | 0.9          | 0.3         | 3.7         | 1.0          | 5.5          | 0.5          | 0.4          | 0.3        | 0.2          | 0.2          |
| <b>Int3</b>  | <b>7.3</b>         | <b>1190</b> | <b>7.1</b>   | <b>7.5</b>   | <b>8.3</b>  | <b>10.4</b> | <b>9.4</b>   | <b>22.6</b>  | <b>7.6</b>   | <b>7.4</b>   | <b>7.6</b> | <b>7.2</b>   | <b>7.2</b>   |
|              | 0.1                | 141.0       | 0.5          | 0.5          | 0.4         | 1.9         | 3.2          | 2.7          | 0.4          | 0.4          | 0.0        | 0.2          | 0.1          |
| <b>Int4</b>  | <b>7.4</b>         | <b>8.1</b>  | <b>661.5</b> | <b>8.0</b>   | <b>7.8</b>  | <b>11.1</b> | <b>7.7</b>   | <b>21.1</b>  | <b>7.4</b>   | <b>7.5</b>   | <b>7.8</b> | <b>7.3</b>   | <b>7.1</b>   |
|              | 0.3                | 0.3         | 188.5        | 1.0          | 0.2         | 1.1         | 0.4          | 4.2          | 0.1          | 0.1          | 0.3        | 0.1          | 0.4          |
| <b>Int5</b>  | <b>8.0</b>         | <b>14.8</b> | <b>8.3</b>   | <b>241.9</b> | <b>8.7</b>  | <b>13.6</b> | <b>8.5</b>   | <b>22.2</b>  | <b>7.9</b>   | <b>8.7</b>   | <b>8.1</b> | <b>7.6</b>   | <b>7.6</b>   |
|              | 0.5                | 3.2         | 0.7          | 38.3         | 0.4         | 2.9         | 0.8          | 0.6          | 0.4          | 0.7          | 0.1        | 0.2          | 0.2          |
| <b>Int7</b>  | <b>7.1</b>         | <b>9.5</b>  | <b>7.3</b>   | <b>7.0</b>   | <b>1292</b> | <b>17.8</b> | <b>7.3</b>   | <b>57.9</b>  | <b>7.1</b>   | <b>7.2</b>   | <b>7.2</b> | <b>7.3</b>   | <b>6.8</b>   |
|              | 0.2                | 0.9         | 0.2          | 0.4          | 117.9       | 5.7         | 0.3          | 6.1          | 0.3          | 0.2          | 0.1        | 0.1          | 0.3          |
| <b>Int8</b>  | <b>7.6</b>         | <b>10.4</b> | <b>7.2</b>   | <b>7.1</b>   | <b>8.0</b>  | <b>2669</b> | <b>7.6</b>   | <b>41.0</b>  | <b>7.2</b>   | <b>7.5</b>   | <b>7.3</b> | <b>7.0</b>   | <b>6.6</b>   |
|              | 0.6                | 1.7         | 0.6          | 0.7          | 0.3         | 286         | 0.7          | 4.7          | 0.3          | 0.5          | 0.2        | 0.3          | 0.2          |
| <b>Int9</b>  | <b>6.9</b>         | <b>8.1</b>  | <b>7.0</b>   | <b>6.8</b>   | <b>7.8</b>  | <b>20.4</b> | <b>251.7</b> | <b>50.1</b>  | <b>6.9</b>   | <b>7.3</b>   | <b>7.1</b> | <b>6.6</b>   | <b>6.7</b>   |
|              | 0.2                | 0.3         | 0.3          | 0.2          | 0.6         | 4.9         | 50.7         | 16.0         | 0.3          | 0.2          | 0.4        | 0.2          | 0.2          |
| <b>Int10</b> | <b>6.9</b>         | <b>8.4</b>  | <b>7.2</b>   | <b>7.1</b>   | <b>7.8</b>  | <b>11.5</b> | <b>7.3</b>   | <b>943.7</b> | <b>7.3</b>   | <b>7.4</b>   | <b>7.5</b> | <b>7.0</b>   | <b>7.2</b>   |
|              | 0.3                | 0.3         | 0.3          | 0.3          | 0.3         | 1.0         | 0.2          | 405.4        | 0.5          | 0.3          | 0.3        | 0.1          | 0.2          |
| <b>Int11</b> | <b>6.9</b>         | <b>9.4</b>  | <b>7.2</b>   | <b>7.1</b>   | <b>7.7</b>  | <b>12.1</b> | <b>7.3</b>   | <b>28.4</b>  | <b>346.9</b> | <b>7.1</b>   | <b>7.4</b> | <b>7.1</b>   | <b>7.4</b>   |
|              | 0.2                | 0.5         | 0.0          | 0.0          | 0.3         | 1.8         | 0.1          | 2.4          | 18.4         | 0.2          | 0.2        | 0.0          | 0.3          |
| <b>Int12</b> | <b>6.9</b>         | <b>14.4</b> | <b>7.4</b>   | <b>7.2</b>   | <b>8.8</b>  | <b>22.5</b> | <b>7.8</b>   | <b>38.9</b>  | <b>7.6</b>   | <b>794.4</b> | <b>7.6</b> | <b>7.1</b>   | <b>7.1</b>   |
|              | 0.5                | 4.0         | 0.5          | 0.4          | 0.8         | 6.5         | 0.7          | 6.7          | 0.4          | 129.2        | 0.2        | 0.2          | 0.2          |
| <b>Int13</b> | <b>7.1</b>         | <b>9.5</b>  | <b>7.3</b>   | <b>7.2</b>   | <b>7.9</b>  | <b>11.0</b> | <b>7.5</b>   | <b>17.2</b>  | <b>7.6</b>   | <b>8.4</b>   | <b>390</b> | <b>7.6</b>   | <b>7.7</b>   |
|              | 0.3                | 2.6         | 0.3          | 0.4          | 0.5         | 1.4         | 0.4          | 1.1          | 0.4          | 0.8          | 28.4       | 0.2          | 0.3          |
| <b>FimE</b>  | <b>7.6</b>         | <b>5.7</b>  | <b>7.6</b>   | <b>7.4</b>   | <b>8.0</b>  | <b>11.6</b> | <b>7.6</b>   | <b>21.7</b>  | <b>7.3</b>   | <b>7.5</b>   | <b>7.3</b> | <b>885.7</b> | <b>10.0</b>  |
|              | 0.6                | 4.9         | 0.1          | 0.0          | 0.1         | 0.0         | 0.2          | 2.5          | 0.0          | 0.1          | 0.1        | 10.8         | 0.1          |
| <b>HbiF</b>  | <b>7.3</b>         | <b>8.8</b>  | <b>7.5</b>   | <b>7.6</b>   | <b>7.6</b>  | <b>8.7</b>  | <b>7.6</b>   | <b>13.8</b>  | <b>7.3</b>   | <b>7.4</b>   | <b>7.5</b> | <b>43.5</b>  | <b>225.7</b> |
|              | 0.1                | 0.1         | 0.1          | 0.2          | 0.2         | 0.2         | 0.2          | 0.5          | 0.0          | 0.1          | 0.2        | 4.2          | 5.0          |

a. The average (upper row, bold) and standard deviation (lower row) of three independent triplicates are shown.

**Supplementary Table 7: Sequence of the memory array**

**Table 7. Sequence of the memory array<sup>a</sup>**

|                                     |                                                                                                                                                                                                                                                                                                                                                                                                                                                                                                                                                                                                                                                                                                                                                                                                                                                                                                                                                                                                                                                                                                                                                                                                                                                                                                                                                                                                                                                                                                                                                                                                                                                                                                                                                                                                                                                                                                                                                                                                                                                                                                                                                                                                                                                                                                                                                                                                                                                                                                                                                                                                                                                                                                                                                                                                                                                                                                                                                                                                                                                                                                                                                                                                                                                                                                                                                                                                                                                                                                                                                                                                                                                                                                                                                                                                                                                                                                                 |
|-------------------------------------|-----------------------------------------------------------------------------------------------------------------------------------------------------------------------------------------------------------------------------------------------------------------------------------------------------------------------------------------------------------------------------------------------------------------------------------------------------------------------------------------------------------------------------------------------------------------------------------------------------------------------------------------------------------------------------------------------------------------------------------------------------------------------------------------------------------------------------------------------------------------------------------------------------------------------------------------------------------------------------------------------------------------------------------------------------------------------------------------------------------------------------------------------------------------------------------------------------------------------------------------------------------------------------------------------------------------------------------------------------------------------------------------------------------------------------------------------------------------------------------------------------------------------------------------------------------------------------------------------------------------------------------------------------------------------------------------------------------------------------------------------------------------------------------------------------------------------------------------------------------------------------------------------------------------------------------------------------------------------------------------------------------------------------------------------------------------------------------------------------------------------------------------------------------------------------------------------------------------------------------------------------------------------------------------------------------------------------------------------------------------------------------------------------------------------------------------------------------------------------------------------------------------------------------------------------------------------------------------------------------------------------------------------------------------------------------------------------------------------------------------------------------------------------------------------------------------------------------------------------------------------------------------------------------------------------------------------------------------------------------------------------------------------------------------------------------------------------------------------------------------------------------------------------------------------------------------------------------------------------------------------------------------------------------------------------------------------------------------------------------------------------------------------------------------------------------------------------------------------------------------------------------------------------------------------------------------------------------------------------------------------------------------------------------------------------------------------------------------------------------------------------------------------------------------------------------------------------------------------------------------------------------------------------------------|
| Memory array                        | <p>ggacgcgccagaaggggagtagctcttcgcccggaccgtcgacaactgctcagctcgtctgcccgaatggatccgagcggtgatccgg<br/>         taaaaccggatccggggaatagccaagagcagtgcocttgcagaagttctcgggagagaatctcgggttagacacatacatagagcggttgg<br/>         aaaggagactgataatggcaatgtacaactatactcgtcggtaaaaaggcaactctacggttagtcccggctgcctctctcgacgaaccgc<br/>         ttacatgcctagccgataagcattatttaggcaactacaactagtagttagtacaagaaacgctgtatTTTTTTTtccatttccaaa<br/> <b>gagcgcccaacgcgacctgaaaattgaaataagactgctgcttggtaaaggcgatgatt</b>gttggaacatttagaggtcgtatccctatcg<br/>         cgaataattccataatgtaca<b>aaacgaattaca</b>aattatttgaccgctaattcaaa<b>tcaagggtg</b>aaaactttgtaatttttggagcgc<br/> <b>cgatcagggagtgga</b>cgccctgggagcgtaca<b>cgctgtggctg</b>cggtg<b>cggtgc</b>aaaaagattgtagcccgctgcgcacatctagtt<br/>         aatgtccgcaagactc<b>cagatcaggg</b>tcgcag<b>agtg</b>tc<b>caacgctccc</b>aggag<b>gtta</b>to<b>gacttgc</b>gtattagg<b>gagacg</b>agaa<b>acgt</b><br/> <b>tccgtccgctgggtcag</b>ttggc<b>caag</b>ttg<b>atgac</b>cggt<b>ctccgtctc</b>ta<b>tcggtg</b>taggtcgtatttggagacagaatata<b>tg</b>gg<br/>         gccagtaagctta<b>aacgtg</b>aacctgcgt<b>aaaag</b>tt<b>aa</b>ggttag<b>gca</b>tg<b>taa</b>act<b>ta</b>act<b>ctca</b>acag<b>gtttata</b>ac<b>cca</b>at<b>ctc</b><br/> <b>agata</b>actat<b>ggcggc</b>acgt<b>gca</b>tt<b>aac</b>ac<b>ggtt</b>gt<b>atcc</b>gt<b>ctaa</b>ag<b>ta</b>ct<b>g</b>gt<b>gc</b>gttggtatactt<b>ca</b>gt<b>ctta</b>ac<b>ca</b>at<b>gc</b>ac<br/>         cggttt<b>gtg</b>ggat<b>gc</b>ct<b>at</b>ttt<b>tata</b>t<b>gga</b>gtt<b>gtt</b>ca<b>ctca</b>acatt<b>gca</b>ag<b>actgt</b>aca<b>cttcc</b>at<b>ag</b>tt<b>tata</b>tt<b>tata</b>t<br/> <b>tgca</b>aaaa<b>taattgg</b>c<b>ga</b>ac<b>gag</b>gt<b>aa</b>ct<b>gg</b>at<b>ac</b>ct<b>ca</b>tc<b>cg</b>ca<b>at</b>ta<b>aa</b>att<b>g</b>ag<b>ca</b>cc<b>attg</b>cc<b>ctt</b>g<b>ca</b>cc<b>ctt</b>g<b>ca</b>g<b>ca</b>g<b>ca</b>g<b>g</b><br/>         tgcctgagatccctagaa<b>taattg</b>ga<b>gtt</b>cg<b>ga</b>ata<b>acta</b>tg<b>caga</b>t<b>acctg</b>at<b>aca</b>act<b>tcca</b>ca<b>aaaa</b>ca<b>accaca</b>ag<b>ca</b>cg<b>gc</b><br/> <b>tgata</b>at<b>cag</b>ca<b>ag</b>ca<b>cc</b>ca<b>ac</b>att<b>cca</b>ca<b>atg</b>ta<b>aa</b>ag<b>ctt</b>ta<b>ac</b>ct<b>ta</b>g<b>ctt</b>ata<b>ca</b>ca<b>aa</b>at<b>ct</b>a<b>att</b>tt<b>cca</b>tg<b>ag</b>g<b>ct</b>g<b>ca</b><br/>         cgacc<b>cg</b>tc<b>ca</b>at<b>ag</b>tc<b>aaa</b>ag<b>gtg</b>ag<b>gtt</b>ta<b>ct</b>at<b>cc</b>tt<b>g</b>at<b>g</b>ag<b>atg</b>tag<b>gtt</b>act<b>aaa</b>at<b>tata</b>ttt<b>cca</b>aa<b>tgga</b><br/> <b>ttttgc</b>ag<b>attcc</b>ag<b>atg</b>cc<b>ct</b>ac<b>aga</b>aa<b>gag</b>gt<b>aca</b>aa<b>ca</b>tt<b>t</b>at<b>t</b>g<b>ga</b>at<b>ta</b>at<b>ag</b>tt<b>og</b>tt<b>tt</b>g<b>g</b>at<b>tt</b>ac<b>og</b>tt<b>ct</b><br/>         ctagcttatgatctgagcgta<b>agttg</b>aa<b>at</b>at<b>gtt</b>ta<b>ct</b>aa<b>ta</b>ag<b>actt</b>at<b>gg</b>gt<b>tg</b>ag<b>ag</b>cg<b>ctct</b>at<b>tag</b>ta<b>aa</b>ca<b>tata</b>aa<b>ac</b>gt<b>t</b><br/>         cgt<b>g</b>ta<b>act</b>at<b>gg</b>gt<b>g</b>ta<b>cag</b>gt<b>g</b>ca<b>catt</b>ag<b>ttg</b>t<b>acc</b>at<b>tt</b>at<b>gtt</b>at<b>g</b>tt<b>g</b>tt<b>aa</b>cc<b>ag</b>g<b>aa</b>ca<b>ct</b>cc<b>gt</b>cc<b>gt</b>gc<b>gc</b><br/>         actagga<b>aga</b>at<b>cc</b>ga<b>ag</b>gt<b>ccc</b>t<b>aa</b>at<b>tt</b>aa<b>tag</b>cag<b>ttg</b>tt<b>g</b>ta<b>ct</b>at<b>tt</b>ag<b>gt</b>ct<b>ccc</b>ag<b>tg</b>aca<b>ca</b>act<b>aa</b>ca<b>taca</b>aa<b>ac</b><br/> <b>aa</b>t<b>aac</b>g<b>gtt</b>g<b>tatt</b>g<b>tag</b>a<b>actg</b>ac<b>ag</b>tt<b>gtt</b>t<b>g</b>ta<b>aca</b>t<b>aa</b>t<b>aca</b>act<b>cc</b>g<b>aata</b>ct<b>ca</b>tag<b>cccc</b>cg<b>att</b>cg<b>cc</b>ag<b>gt</b>a<br/>         cttacgagga<b>a</b>tt<b>act</b>t<b>ata</b>tc<b>cg</b>act<b>ca</b>at<b>gga</b>tt<b>g</b>ct<b>tata</b>tt<b>ta</b>ca<b>gg</b>ac<b>ca</b>act<b>gga</b>ct<b>g</b>g<b>aaaa</b>ca<b>ca</b>ca<b>atg</b>t<b>atg</b>cg</p> |
| Sequence after Int2/5/7/8 Induction | <p>ggacgcgccagaaggggagtagctcttcgcccggaccgtcgacaactgctcagctcgtctgcccgaatggatccgagcggtgatccgg<br/>         aacgctcggatccatttggcgacgacgagctgagcagtagtgcagcggctccggcgagaatctcgggttagacacatacatagagcggttgg<br/>         aaaggagactgataatggcaatgtacaactatactcgtcggtaaaaaggcaactctacggttagtcccggctgcctctctcgacgaaccgc<br/>         ttacatgcctagccgataagcattatttaggcaactacaactagtagttagtacaagaaacgctgtatTTTTTTTtccatttccaaa<br/> <b>gagcgcccaacgcgacctgaaaattgaaataagactgctgcttggtaaaggcgatgatt</b>gttggaacatttagaggtcgtatccctatcg<br/>         cgaataattccataatgtaca<b>aaacgaattaca</b>aattatttgaccgctaattcaaa<b>tcaagggtg</b>aaaactttgtaatttttggagcgc<br/> <b>cgatcagggagtgga</b>cgccctgggagcgtaca<b>cgctgtggctg</b>cggtg<b>cggtgc</b>aaaaagattgtagcccgctgcgcacatctagtt<br/>         aatgtccgcaagactc<b>cagatcaggg</b>tcgcag<b>agtg</b>tc<b>caacgctccc</b>aggag<b>gtta</b>to<b>gacttgc</b>gtattagg<b>gagacg</b>agaa<b>acgt</b><br/> <b>tccgtccgctgggtcag</b>ttggc<b>caag</b>ttg<b>atgac</b>cggt<b>ctccgtctc</b>ta<b>tcggtg</b>taggtcgtatttggagacagaatata<b>tg</b>gg<br/>         gccagtaagctta<b>aacgtg</b>aacctgcgt<b>aaaag</b>tt<b>aa</b>ggttag<b>gca</b>tg<b>taa</b>act<b>ta</b>act<b>ctca</b>acag<b>gtttata</b>ac<b>cca</b>at<b>ctc</b><br/> <b>agata</b>actat<b>ggcggc</b>acgt<b>gca</b>tt<b>aac</b>ac<b>ggtt</b>gt<b>atcc</b>gt<b>ctaa</b>ag<b>ta</b>ct<b>g</b>gt<b>gc</b>gttggtatactt<b>ca</b>gt<b>ctta</b>ac<b>ca</b>at<b>gc</b>ac<br/>         cggttt<b>gtg</b>ggat<b>gc</b>ct<b>at</b>ttt<b>tata</b>t<b>gga</b>gtt<b>gtt</b>ca<b>ctca</b>acatt<b>gca</b>ag<b>actgt</b>aca<b>cttcc</b>at<b>ag</b>tt<b>tata</b>tt<b>tata</b>t<br/> <b>tgca</b>aaaa<b>taattgg</b>c<b>ga</b>ac<b>gag</b>gt<b>aa</b>ct<b>gg</b>at<b>ac</b>ct<b>ca</b>tc<b>cg</b>ca<b>at</b>ta<b>aa</b>att<b>g</b>ag<b>ca</b>cc<b>attg</b>cc<b>ctt</b>g<b>ca</b>cc<b>ctt</b>g<b>ca</b>g<b>ca</b>g<b>ca</b>g<b>g</b><br/>         tgcctgagatccctagaa<b>taattg</b>ga<b>gtt</b>cg<b>ga</b>ata<b>acta</b>tg<b>caga</b>t<b>acctg</b>at<b>aca</b>act<b>tcca</b>ca<b>aaaa</b>ca<b>accaca</b>ag<b>ca</b>cg<b>gc</b><br/> <b>tgata</b>at<b>cag</b>ca<b>ag</b>ca<b>cc</b>ca<b>ac</b>att<b>cca</b>ca<b>atg</b>ta<b>aa</b>ag<b>ctt</b>ta<b>ac</b>ct<b>ta</b>g<b>ctt</b>ata<b>ca</b>ca<b>aa</b>at<b>ct</b>a<b>att</b>tt<b>cca</b>tg<b>ag</b>g<b>ct</b>g<b>ca</b><br/>         cgacc<b>cg</b>tc<b>ca</b>at<b>ag</b>tc<b>aaa</b>ag<b>gtg</b>ag<b>gtt</b>ta<b>ct</b>at<b>cc</b>tt<b>g</b>at<b>g</b>ag<b>atg</b>tag<b>gtt</b>act<b>aaa</b>at<b>tata</b>ttt<b>cca</b>aa<b>tgga</b><br/> <b>ttttgc</b>ag<b>attcc</b>ag<b>atg</b>cc<b>ct</b>ac<b>aga</b>aa<b>gag</b>gt<b>aca</b>aa<b>ca</b>tt<b>t</b>at<b>t</b>g<b>ga</b>at<b>ta</b>at<b>ag</b>tt<b>og</b>tt<b>tt</b>g<b>g</b>at<b>tt</b>ac<b>og</b>tt<b>ct</b><br/>         ctagcttatgatctgagcgta<b>agttg</b>aa<b>at</b>at<b>gtt</b>ta<b>ct</b>aa<b>ta</b>ag<b>actt</b>at<b>gg</b>gt<b>tg</b>ag<b>ag</b>cg<b>ctct</b>at<b>tag</b>ta<b>aa</b>ca<b>tata</b>aa<b>ac</b>gt<b>t</b><br/>         cgt<b>g</b>ta<b>act</b>at<b>gg</b>gt<b>g</b>ta<b>cag</b>gt<b>g</b>ca<b>catt</b>ag<b>ttg</b>t<b>acc</b>at<b>tt</b>at<b>gtt</b>at<b>g</b>tt<b>g</b>tt<b>aa</b>cc<b>ag</b>g<b>aa</b>ca<b>ct</b>cc<b>gt</b>cc<b>gt</b>gc<b>gc</b><br/>         actagga<b>aga</b>at<b>cc</b>ga<b>ag</b>gt<b>ccc</b>t<b>aa</b>at<b>tt</b>aa<b>tag</b>cag<b>ttg</b>tt<b>g</b>ta<b>ct</b>at<b>tt</b>ag<b>gt</b>ct<b>ccc</b>ag<b>tg</b>aca<b>ca</b>act<b>aa</b>ca<b>taca</b>aa<b>ac</b><br/> <b>aa</b>t<b>aac</b>g<b>gtt</b>g<b>tatt</b>g<b>tag</b>a<b>actg</b>ac<b>ag</b>tt<b>gtt</b>t<b>g</b>ta<b>aca</b>t<b>aa</b>t<b>aca</b>act<b>cc</b>g<b>aata</b>ct<b>ca</b>tag<b>cccc</b>cg<b>att</b>cg<b>cc</b>ag<b>gt</b>a<br/>         cttacgagga<b>a</b>tt<b>act</b>t<b>ata</b>tc<b>cg</b>act<b>ca</b>at<b>gga</b>tt<b>g</b>ct<b>tata</b>tt<b>ta</b>ca<b>gg</b>ac<b>ca</b>act<b>gga</b>ct<b>g</b>g<b>aaaa</b>ca<b>ca</b>ca<b>atg</b>t<b>atg</b>cg</p> |

a. The colors of the att sequences correspond to Figure 3a. The 50bp spacer sequences flanked by att sites are shown in grey.

***Supplementary Table 8: Spacer sequences used to construct the memory array***

**Table 8.** Spacer sequences used to construct the memory array

| Flanking att sites | sequences                                            |
|--------------------|------------------------------------------------------|
| Int2               | gtcgccaaatggatccgagcgttgatccggtaaaaccggattcggggaat   |
| Int3               | cggtagtcccggtcgcctctctcgacgaaccgcttacatgcctagccgat   |
| Int4               | gttgatgaacattagaggtcgtatcctatcgcgataattccatatacgtaca |
| Int5               | aaaaagatttgatgcccgtcgcacacatctagttaatgtccgcaagactc   |
| Int7               | atcggtaggtcgatTTTTGGACAGAAATATAGGGGCCAGTAAGCTTAC     |
| Int8               | gcgttggtatacttcagtccttaaccaatgcaccggtttgtgcggatgcct  |
| Int9               | agcaccattgccttggcgatcagcatgaggctgcctgagatcctctagaa   |
| Int10              | atacacaatctaattttccatgtaggctgcacgaccccgtccaatagtc    |
| Int11              | agttcgtgttttgattgttacacgttctctagcttatgatctgagcgta    |
| Int12              | ccagaggaacactccgtcggtcgcgcactaggaagaattccgaaggtccc   |
| Int13              | ctcatagcccccgattcggccaggtacttacgaggaattacttatatccg   |

***Supplementary Table 9: Primer sequences used to characterize the memory array***

**Table 9.** Primer sequences used to characterize the memory array

| Name      | Sequences                                      |
|-----------|------------------------------------------------|
| Int2_fwd  | caaaatggtctttacgatgccattggg                    |
| Int2_rev  | tccgagcgttgatccggtaaaac                        |
| Int3_fwd  | gcccgatcaactcgcgc                              |
| Int3_rev  | tctctcgacgaaccgcttacatgc                       |
| Int4_fwd  | gcgtagacacatacatgagcgtttgtaaagg                |
| Int4_rev  | cattagaggtcgtatcctatcgcgataaattcc              |
| Int5_fwd  | ttttatccatttccaaagagcgcgc                      |
| Int5_rev  | atgcccgctgcgcacat                              |
| Int7_fwd  | gtaatttttgagcgcggatcag                         |
| Int7_rev  | cgattttgacagaaaatatggggcc                      |
| Int8_fwd  | gggagacgagaaacgttccgtcc                        |
| Int8_rev  | gtatacttcagtcttaaccaatgcaccggttg               |
| Int9_fwd  | gtttataacacccaatcatcagataactatggcg             |
| Int9_rev  | gcatgaggctgctgagatcctcta                       |
| Int10_fwd | atacttccatagttttattaatttatattgcgaaaaataattggcg |
| Int10_rev | ctaattttccatgtaggctgcacgacc                    |
| Int11_fwd | caacaaaaacaaccacaagcagct                       |
| Int11_rev | gtgttttggattgttacacgttctctagcttatgatc          |
| Int12_fwd | tatttatattttccaaatggattttgcagattccc            |
| Int12_rev | cactccgtcggtcgcgc                              |
| Int13_fwd | gtaaacatataaacgttcgtggtaactatgggtgttac         |
| Int13_rev | atagcccccgattcgcga                             |

***Supplementary Note 1: Discovery strategy when prophages occur within a conserved gene***

Our method to identify the recognition sites of an LSTP integration is based on a genome comparisons of those regions that occur up- and downstream of the prophage. This requires a reference genome that lacks the prophage. We also developed a complimentary method that does not require a reference genome when the prophage occurs within a conserved gene. In these cases, the truncated gene fragments corresponding to the N- and C-terminal protein fragments can be identified up- and downstream of the prophage. The truncated protein fragments are compared against the NCBI protein database using a BLASTP search (default parameters). If a protein is found that is longer than the fragments, it can be used as the reference protein. The 5'- and 3'- gene fragments corresponding to the protein fragments are aligned with the gene for the reference protein (**Supplementary Fig.1**). This yields the 2-18bp core sequence that occurs where the protein coding sequence splits. The *attL* and *attR* sites were defined by taking about 60bp around the core sequence. The *attB* and *attP* sites were reconstructed using *attL* and *attR* sequences, as described in **Figure 1b**. Eight out of the 34 members of integrase-*attB/P* library was discovered using this strategy and they are demarcated in Table 1. For some integrases both strategies can be applied.

**Supplementary Note 2: Weak promoter activity of the Int13 attP site**

When building all the memory switches, the first construct that was attempted by placing the *attP* site upstream of the *gfp* coding sequence. For the majority this was not a problem, but we found that the Int13 site generated a weak constitutive promoter (**Supplementary Fig.2**). This activity was sufficient to move the OFF cell population past the threshold that we used across the memory switches to determine the % of cells that turn on. Unintentional promoters appearing within parts or at part junctions have been observed previously<sup>13</sup>. We eliminated this problem by swapping the *att* sites so that *attP* occurs downstream of *gfp*. Note that after flipping, the resulting *attR* site is insulated by the spacer and RiboJ sequence.

### **Supplementary Note 3: Optimization of RBS sequence for each integrase**

Optimizing the dynamic range of each memory switch required tuning the ribosome binding site (RBS) controlling the expression of the integrase. If the expression is too high, then the switch turns on prior to the addition of inducer. If the expression is too low, then the switch cannot turn on or only a subpopulation of cells turns on.

The optimal level of expression depends on a number of factors and is not known *a priori*. Therefore, to identify the optimal RBS, degenerate RBS sequences consisting of 16-32 sequences were designed using the RBS Calculator for each integrase that encompassed translation initiation rates from  $10^0$  to  $10^4$  au<sup>4</sup>. The degenerate RBS sequences were synthesized in primers and inserted upstream of the coding sequence of each integrase gene using inverse PCR. In detail, the plasmid sequence was amplified using Phusion HF DNA polymerase (New England Biolabs), digested with DpnI restriction enzyme (New England Biolabs) and gel-recovered. The product was then phosphorylated by T4 Polynucleotide Kinase (New England Biolabs) and ligated by T4 ligase (Invitrogen) in a single reaction for 1 hour at room temperature. *E. coli* DH10b cells containing only the reporter plasmid were made electro-competent and transformed with the cognate controller plasmids with degenerate RBS by electroporation. For each integrase 32-64 colonies were picked and cultured in LB media plus 0.5% glucose, 34 µg/ml chloramphenicol and 50 µg/ml kanamycin for screening. The overnight (16 hour) cultures of transformants were washed twice and diluted 200 times in LB containing 0.5% glucose (control) or 1 mM arabinose (induction), and then grown for 6h before flow cytometry analysis. A clone was chosen to have an “optimal” RBS if it exhibited minimal leakage (<0.5% population expressing GFP) and maximal GFP expression when induced (**Supplementary Table 3**).



**Supplementary Note 4: The impact on growth when single or multiple integrases were induced**

In Figure 2G the impact on growth is measured when single integrases were induced. To investigate if the growth defect is additive when multiple integrases are used, cells containing 2-integrase cascade (**Supplementary Fig. 8**, Cas\_2+5), 3-integrase cascade (**Figure 3f**, Cas\_2+5+7) and 4-integrase operon (**Figure 3c**, Cis\_2+7+8+5) were compared with strains containing single integrases (**Figure 2**, Int2, Int5, Int7 and Int8) after 12 hours induction with various concentrations of arabinose (**Supplementary Fig. 9**). The final OD (600nm) decreased slightly in cells containing single integrases at high concentration of arabinose for cells expressing single integrases. However the same effect was not observed in cells incorporating multiple integrases, suggesting that using multiple integrases in parallel is not constrained by growth defect.

### Supplementary References

1. Canchaya, C. et al. Genome analysis of an inducible prophage and prophage remnants integrated in the *Streptococcus pyogenes* strain SF370. *Virology* **302**, 245-258 (2002).
2. Ikeda, H. *Streptomyces* phage phiK38-1 DNA, region around attP and integrase. *Genbank AB251919.1* (2006).
3. Brenciani, A. et al. Phim46.1, the main *Streptococcus pyogenes* element carrying *mef(A)* and *tet(O)* genes. *Antimicrob Agents Chemother* **54**, 221-229 (2010).
4. Salis, H.M., Mirsky, E.A. & Voigt, C.A. Automated design of synthetic ribosome binding sites to control protein expression. *Nat Biotechnol* **27**, 946-950 (2009).
5. Xie, Y., Yao, Y., Kolisnychenko, V., Teng, C.H. & Kim, K.S. HbiF regulates type 1 fimbriation independently of FimB and FimE. *Infect Immun* **74**, 4039-4047 (2006).
6. Klemm, P. Two regulatory *fim* genes, *fimB* and *fimE*, control the phase variation of type 1 fimbriae in *Escherichia coli*. *EMBO J* **5**, 1389-1393 (1986).
7. Moon, T.S. et al. Construction of a genetic multiplexer to toggle between chemosensory pathways in *Escherichia coli*. *J Mol Biol* **406**, 215-227 (2011).
8. Stanton, B.C. et al. Genomic mining of prokaryotic repressors for orthogonal logic gates. *Nat Chem Biol* **10**, 99-105 (2014).
9. Lou, C., Stanton, B., Chen, Y.J., Munsky, B. & Voigt, C.A. Ribozyme-based insulator parts buffer synthetic circuits from genetic context. *Nat Biotechnol* **30**, 1137-1142 (2012).
10. Deuschle, U., Kammerer, W., Gentz, R. & Bujard, H. Promoters of *Escherichia coli*: a hierarchy of in vivo strength indicates alternate structures. *EMBO J* **5**, 2987-2994 (1986).
11. Cormack, B.P., Valdivia, R.H. & Falkow, S. FACS-optimized mutants of the green fluorescent protein (GFP). *Gene* **173**, 33-38 (1996).
12. Campbell, R.E. et al. A monomeric red fluorescent protein. *Proc Natl Acad Sci U S A* **99**, 7877-7882 (2002).
13. Yao, A.I. et al. Promoter element arising from the fusion of standard BioBrick parts. *ACS Synth Biol* **2**, 111-120 (2013).
